# Supplementary material for: Daytime napping, sleep duration and serum C reactive protein: a population-based cohort study
Source: PubMed Central journal article supplement (PMC4244397; doi:10.1136/bmjopen-2014-006071), 2014-11-11
Supplement: bmjopen-2014-006071.draft_revisions.pdf [file bmjopen-2014-006071.draft_revisions.pdf]

# BMJ Open

## Daytime napping, sleep duration and serum C-reactive protein: a population-based cohort study

|                                 |                                                                                                                                                                                                                                                                                                                                                                                                                                                                                                                                                                                                                                                                                                  |
|---------------------------------|--------------------------------------------------------------------------------------------------------------------------------------------------------------------------------------------------------------------------------------------------------------------------------------------------------------------------------------------------------------------------------------------------------------------------------------------------------------------------------------------------------------------------------------------------------------------------------------------------------------------------------------------------------------------------------------------------|
| Journal:                        | <i>BMJ Open</i>                                                                                                                                                                                                                                                                                                                                                                                                                                                                                                                                                                                                                                                                                  |
| Manuscript ID:                  | bmjopen-2014-006071                                                                                                                                                                                                                                                                                                                                                                                                                                                                                                                                                                                                                                                                              |
| Article Type:                   | Research                                                                                                                                                                                                                                                                                                                                                                                                                                                                                                                                                                                                                                                                                         |
| Date Submitted by the Author:   | 08-Jul-2014                                                                                                                                                                                                                                                                                                                                                                                                                                                                                                                                                                                                                                                                                      |
| Complete List of Authors:       | Leng, Yue; University of Cambridge, Department of Public Health and Primary Care<br>Ahmadi-Abhari, Sara; University of Cambridge, Department of Public Health and Primary Care<br>Wainwright, Nicholas ; University of Cambridge, UK,<br>Cappuccio, Francesco; University of Warwick, Warwick Medical School, Clinical Sciences Research Institute<br>Surtees, Paul; University of Cambridge, Department of Public Health and Primary Care<br>Luben, Robert; University of Cambridge, Department of Public Health and Primary Care<br>Brayne, Carol; University of Cambridge, Institute of Public Health<br>Khaw, Kay-Tee; University of Cambridge, Department of Public Health and Primary Care |
| <b>Primary Subject Heading</b>: | Epidemiology                                                                                                                                                                                                                                                                                                                                                                                                                                                                                                                                                                                                                                                                                     |
| Secondary Subject Heading:      | Public health                                                                                                                                                                                                                                                                                                                                                                                                                                                                                                                                                                                                                                                                                    |
| Keywords:                       | Sleep, Napping, C-reactive protein, Inflammation, Population                                                                                                                                                                                                                                                                                                                                                                                                                                                                                                                                                                                                                                     |
|                                 |                                                                                                                                                                                                                                                                                                                                                                                                                                                                                                                                                                                                                                                                                                  |

SCHOLARONE™  
Manuscripts

## Daytime napping, sleep duration and serum C-reactive protein: a population-based cohort study

Yue Leng, M,Phil<sup>1\*</sup>, Sara Ahmadi-Abhari, MD<sup>1</sup>, Nick W.J. Wainwright, PhD<sup>1</sup>, Francesco P. Cappuccio, FRCP, FAHA<sup>2</sup>, Paul G. Surtees, PhD<sup>1</sup>, Robert Luben, MSc<sup>1</sup>, Carol Brayne, MD, FRCP<sup>3</sup>, Kay-Tee Khaw, MD, FRCP<sup>1</sup>

### Affiliations

<sup>1</sup> Department of Public Health and Primary Care, Strangeways Research Laboratory, University of Cambridge, Cambridge, UK

<sup>2</sup> Division of Mental Health & Wellbeing, Warwick Medical School, University of Warwick, Coventry, UK

<sup>3</sup> Department of Public Health and Primary Care, Institute of Public Health, University of Cambridge, Cambridge, UK

Word count: 2975 (Main text, excluding title page, abstract, references, figures and tables);

---

\* Address for correspondence: Yue Leng, Department of Public Health and Primary Care, Strangeways Research Laboratory, University of Cambridge, Cambridge CB1 8RN, UK (Email: [yl411@medschl.cam.ac.uk](mailto:yl411@medschl.cam.ac.uk); Tel: +44(0)1223748686)

## ABSTRACT

**Objectives:** To explore whether daytime napping and sleep duration are linked to serum C-reactive protein (CRP), a pro-inflammatory marker, in an older-aged British population.

**Design:** Population-based prospective cohort study

**Setting:** European Prospective Investigation into Cancer and Nutrition (EPIC)-Norfolk study.

**Participants:** A total of 5018 men and women aged 48-92 years reported their sleep habits and had serum CRP levels measured.

**Outcome and measures:** CRP was measured (mg/l) during 2006-2011 in fresh blood samples using high-sensitivity methods. Participants reported napping habits during 2002-2004, and reported sleep quantity during 2006-2007. Multivariable linear regression models were used to examine the association between napping and log-transformed CRP, and geometric mean CRP levels were calculated.

**Results:** After adjustment for age and sex, those who reported napping had 10% higher CRP levels compared to those not napping. The association was attenuated but remained borderline significant [ $\beta = 0.05$  (95% CI: 0.00, 0.10)] after further adjustment for social class, education, marital status, body mass index, physical activity, smoking, alcohol intake, self-reported health, pre-existing diseases, systolic blood pressure, hypnotic drug use, depression and in women only hormone replacement therapy use. The geometric means (95%CI) of CRP levels were 2.38 (2.29-2.47) mg/l and 2.26 (2.21-2.32) mg/l for those who reported napping and no

1  
2  
3 napping, respectively. A U-shaped association was observed between time spent in  
4 bed at night and CRP levels, and night time sleep duration was not associated with  
5 serum CRP levels. The association between napping and CRP was stronger for older  
6 participants, and amongst extremes of time spent in bed at night.  
7  
8  
9  
10

11  
12 **Conclusions:** Daytime napping was associated with increased CRP levels in an older-  
13 aged British population. Further studies are needed to determine whether daytime  
14 napping is a cause for systemic inflammation, or if it is a symptom or consequence of  
15 underlying health problems.  
16  
17  
18  
19  
20

21  
22 **Keywords:** *Sleep; Napping; C-reactive protein; Inflammation; Population*  
23  
24  
25  
26  
27  
28  
29  
30  
31  
32  
33  
34  
35  
36  
37  
38  
39  
40  
41  
42  
43  
44  
45  
46  
47  
48  
49  
50  
51  
52  
53  
54  
55  
56  
57  
58  
59  
60

## Article summary

### Article focus:

- Daytime napping has been associated with cardiovascular disease and mortality, but the biological implication of napping is unclear.
- To our knowledge, this is the first population-based study to examine the association between daytime napping and serum CRP levels.
- We also studied both time spent in bed at night and sleep duration in relation to CRP levels.

### Key messages:

- Daytime napping was associated with 10% higher CRP levels, independent of age and sex.
- The association was more pronounced in women, older participants, and amongst extremes of time spent in bed at night.
- Sleep duration was not associated with CRP levels.

### Strengths and limitations:

- Our study benefits from a large population-based sample, measures of both daytime and night time sleep, and a wide range of covariates available for adjustment.
- Sleep habits were self-reported
- The purpose and duration of napping was not reported, and sleep apnea was not measured.

## Introduction

Recently there has been growing interest in studying the health implications of daytime napping. Although the benefits of napping on wakefulness performance have been widely documented, especially among shift workers,<sup>1</sup> a few studies also reported an increased health risk associated with daytime napping. Specifically, daytime napping has been associated with increased mortality,<sup>2,3</sup> cardiovascular,<sup>4</sup> and diabetes risk.<sup>5</sup> We have recently found a 32% increased mortality risk among those who napped for  $\geq 1$ h/day in a middle- to older- aged English population.<sup>6</sup> While it is not yet clear whether daytime napping is a cause or symptom of the increased health risk, examination of the physiological correlations of napping will help to gain understanding of the napping-health relationship.

One important proposed pathway for the association between sleep and health outcomes is through inflammation.<sup>7</sup> C-reactive protein (CRP), a general marker for inflammation, was first suggested to increase after sleep deprivation in an experimental study.<sup>8</sup> Since then, there have been increasing numbers of observational studies which produced mixed findings on the association. Long sleep duration has been associated with increasing CRP among men,<sup>9</sup> women,<sup>10</sup> as well as in the sexes combined sample,<sup>11,12</sup> with long sleep being brought up as a potential marker of underlying inflammatory illness.<sup>11</sup> By contrast, Miller et al<sup>13</sup> found an association between short sleep duration and increased CRP only in women. Taheri et al suggested no significant association between CRP levels and sleep duration in the Wisconsin Sleep Cohort Study.<sup>14</sup>

1  
2  
3 Despite the growing interest into the inflammatory correlates of night time sleep, there  
4 has been limited evidence on the physiological effects of daytime napping.  
5 Experimental study has reported a beneficial effect of napping on immune cells  
6 following acute sleep restriction.<sup>15</sup> However, habitual daytime napping as a lifestyle  
7 might relate to different physiological effects compared to napping as a form of  
8 recovery sleep, and understanding the link between habitual napping and  
9 inflammation could help to clarify the association observed for napping and the  
10 increased mortality risk. Therefore we set out to examine the associations between  
11 daytime napping and serum CRP levels in the European Prospective Investigation into  
12 Cancer (EPIC)-Norfolk cohort study. In addition, we have previously reported the  
13 different implications between sleep duration and time spent in bed,<sup>16</sup> so  
14 confirmatory analysis was also conducted to test the associations separately for sleep  
15 duration and time spent in bed at night. Given the gender disparity suggested by some  
16 previous studies,<sup>14, 18</sup> we explored sex differences in the associations.  
17  
18  
19  
20  
21  
22  
23  
24  
25  
26  
27  
28  
29  
30  
31  
32  
33  
34

## 35 **Methods**

### 36 **Participants**

37  
38  
39 The design and study methods of EPIC-Norfolk have been described  
40 previously.<sup>18</sup> Briefly, 25,639 men and women were recruited into the EPIC-Norfolk  
41 study during 1993-1997 using general practice age-sex registers, and attended the  
42 baseline health check. These participants were then followed up for two further health  
43 examinations from 1996 to 2000 and from 2006 to 2011. In between these health  
44 examinations, participants were sent questionnaires for completion and returned by  
45  
46  
47  
48  
49  
50  
51  
52  
53  
54  
55  
56  
57  
58  
59  
60

1  
2  
3 post. The Norwich District Ethics Committee approved the study and all participants  
4  
5 gave signed informed consent.  
6  
7

### 8 9 **Sleep Measures**

10  
11 Habitual daytime napping was ascertained during 2002-2004, by asking participants  
12  
13 the question “Do you normally take a nap during the day?”.  
14  
15

16  
17 “Night time sleep duration” and “Time spent in bed at night” were ascertained during  
18  
19 2006-2007, by asking participants “On average, about how many hours have you slept  
20  
21 each night?”; “At what time do you normally get up?” and “At what time do you  
22  
23 normally go to bed?”. “Time spent in bed” was derived from the differences between  
24  
25 rise time and bedtime, and as a weighted mean measure of weekday and weekend  
26  
27 times [ $5/7*(\text{time on a week- day})+ 2/7*(\text{time on a weekend day})$ ].  
28  
29  
30

### 31 32 **CRP**

33  
34  
35 CRP was measured (mg/l) at the third health examination (2006-2011) in fresh blood  
36  
37 samples using high-sensitivity methods using the Siemens Dimension clinical  
38  
39 chemistry analyzer (Siemens Dimension clinical chemistry analyzer, Newark,  
40  
41 Delaware, US).  
42  
43  
44

### 45 46 **Covariates**

47  
48 Covariates measured closer in time to each measure of sleep were chosen and  
49  
50 included in the models for the corresponding sleep measures. The covariates were  
51  
52 chosen as a priori based on their link with CRP and sleep.<sup>16,19</sup> Social class  
53  
54 (professionals, managerial and technical occupations, skilled workers subdivided into  
55  
56 non-manual and manual, partly skilled workers and unskilled manual workers) and  
57  
58  
59  
60



1  
2  
3 education (highest qualification attained: no qualifications, educated to age 16,  
4  
5 educated to age 18, and educated to degree level) were assessed at the baseline  
6  
7 questionnaire. Body Mass Index (BMI; weight in kilograms divided by height in  
8  
9 meters squared) and Systolic Blood Pressure (SBP) (mmHg) were objectively  
10  
11 assessed through the health examination. The other covariates reported by  
12  
13 questionnaires included: marital status (single, married, widowed, separated and  
14  
15 divorced), physical activity (inactive, moderately inactive, moderately active and  
16  
17 active<sup>20</sup>), smoking status (current, former and non-smokers), alcohol intake (units of  
18  
19 alcohol drunk per week), self-reported general health (excellent, good, moderate or  
20  
21 poor), Major Depressive Disorder (MDD) (Yes/No), pre-existing diseases (including  
22  
23 self-reported stroke, myocardial infarction, diabetes, cancer, asthma, bronchitis, and  
24  
25 emphysema), use of hypnotic drugs (Yes/No), and Hormone Replacement Therapy  
26  
27 (HRT) use.  
28  
29  
30  
31

### 32 33 **Statistical analysis**

34  
35  
36 Analysis was restricted to those participants with complete data on all covariates. A  
37  
38 total of 5018 participants had complete data on CRP and at least one of the sleep  
39  
40 measures and were included in the analysis.  
41  
42

43  
44 The CRP values were natural-log transformed ( $\log_e$  CRP) to approximate a normal  
45  
46 distribution. Due to the U-shaped relationship reported by previous studies on sleep  
47  
48 duration and health risk,<sup>22,23</sup> and in order to retain sufficient numbers, sleep duration  
49  
50 was categorized into three categories (<6, 6-8, and >8 hours) and time spent in bed  
51  
52 was categorized into four categories (<6, 6-8, 8-10, and >10 hours). Multivariable  
53  
54 linear regression models using  $\log_e$  CRP as the outcome were conducted to examine  
55  
56 the associations between each sleep measure (daytime napping [N=4712], time spent  
57  
58  
59  
60

1  
2  
3 in bed [N=4476] and sleep duration [N=4795]) and CRP levels. For each sleep  
4  
5 variable, results were presented: A. adjusted for age, sex; B. further adjusted for social  
6  
7 class, education and marital status, BMI, physical activity, smoking and alcohol  
8  
9 intake, depression, self-reported health, pre-existing diseases, SBP, hypnotic drug use  
10  
11 and in women only postmenopausal HRT. The sleep measures were mutually adjusted  
12  
13 in model B. Since the associations for sleep duration and time in bed might be non-  
14  
15 linear (approximately U-shaped), the  $\beta$  coefficients (with 95% confidence intervals)  
16  
17 were calculated with 6-8h being the reference groups for the examination of sleep  
18  
19 quantitative measures. For analysis by napping habit, the no napping category was  
20  
21 chosen as reference group. Results were presented for the whole sample and for men  
22  
23 and women separately.  
24  
25  
26

27  
28 Geometric-mean (95% confidence interval, CI) serum CRP values (mg/l) were  
29  
30 calculated by exponentiating crude and adjusted-least square mean (95% CI)  $\log_e$  CRP  
31  
32 values. Finally, subgroup analysis was conducted for the main sleep variable of  
33  
34 interest, napping and time spent in bed at night, to explore the effects of potential  
35  
36 effect modifiers (including age, sex, social class, smoking, BMI, physical activity and  
37  
38 pre-existing diseases). These analyses were adjusted for age, sex, social class,  
39  
40 education, marital status and BMI. The two by two interactions between napping  
41  
42 habit, time in bed, and sleep duration were examined using the likelihood ratio test.  
43  
44 Sensitivity analysis All statistical tests were two-sided, and a p value <0.05 was  
45  
46 considered statistically significant. Analyses were implemented in STATA 12.0.  
47  
48  
49  
50  
51  
52  
53  
54  
55  
56  
57  
58  
59  
60

## Results

Characteristics of the study sample (2267 men, 2751 women) are shown in table 1. The mean age of the participants was 69.5 (ranging from 48 to 92) years old. More than 60% of the sample came from non-manual social class, and 48.0% were former or current smokers. A total of 38.5% men and 23.1% women reported daytime napping. The average time people spent in bed every night was  $8.6 \pm 0.8$  h and the average sleep duration was  $6.9 \pm 1.1$  h. Serum CRP ranged from 0.1-116.6 mg/l, with a median of 2.0 mg/l (interquartile range 2.07 mg/l).

Table 1 Baseline characteristics of the EPIC-Norfolk participants

|                                     | Men            | Women         | Total          |
|-------------------------------------|----------------|---------------|----------------|
| <b>Age (years) †</b>                | 70.5 (8.0)     | 68.6 (7.9)    | 69.5 (8.0)     |
| <b>Social class</b>                 |                |               |                |
| Non-manual                          | 1495 (66.5%)   | 1885 (69.3%)  | 3380 (68.0%)   |
| Manual                              | 753 (33.5%)    | 836 (30.7%)   | 1589 (32.0%)   |
| <b>Education</b>                    |                |               |                |
| Lower                               | 686 (30.3%)    | 1148 (41.7%)  | 1834 (36.6%)   |
| Higher                              | 1580 (69.7%)   | 1602 (58.3%)  | 3182 (63.4%)   |
| <b>Marital status</b>               |                |               |                |
| Single                              | 60 (2.8%)      | 99 (3.8%)     | 159 (3.3%)     |
| Married                             | 1929 (90.4%)   | 2017 (77.6%)  | 3946 (83.4%)   |
| Others                              | 144 (6.8%)     | 484 (18.6%)   | 628 (13.3%)    |
| <b>Smoking</b>                      |                |               |                |
| Current smoker                      | 147 (6.5%)     | 194 (7.1%)    | 341 (6.8%)     |
| Former smoker                       | 1178 (52.1%)   | 881 (32.1%)   | 2059 (41.2%)   |
| Never smoked                        | 936 (41.4%)    | 1666 (60.8%)  | 2602 (52.0%)   |
| <b>Physical activity</b>            |                |               |                |
| Inactive                            | 624 (29.0%)    | 677 (25.9%)   | 1301 (27.4%)   |
| Moderately inactive                 | 534 (24.9%)    | 877 (33.6%)   | 1411 (29.6%)   |
| Moderately active                   | 497 (23.1%)    | 613 (23.5%)   | 1110 (23.3%)   |
| Active                              | 493 (23.0%)    | 447 (17.1%)   | 940 (19.7%)    |
| <b>BMI (kg/m<sup>2</sup>) †</b>     | 26.7 (3.1)     | 26.0 (4.0)    | 26.3 (3.6)     |
| <b>SBP (mmHg) †</b>                 | 134.9 (16.9)   | 129.9 (17.3)  | 132.2 (17.3)   |
| <b>Alcohol (units)*</b>             | 8.0 (3.0-15.0) | 3.0 (1.5-8.0) | 5.0 (2.0-11.0) |
| <b>Pre-existing diseases</b>        |                |               |                |
| No                                  | 2095 (97.5%)   | 2499 (98.9%)  | 4594 (98.2%)   |
| Yes                                 | 53 (2.5%)      | 29 (1.1%)     | 82 (1.8%)      |
| <b>Hypnotic use</b>                 |                |               |                |
| No                                  | 2236 (98.6%)   | 2717 (98.8%)  | 4953 (98.7%)   |
| Yes                                 | 31 (1.4%)      | 34 (1.2%)     | 65 (1.3%)      |
| <b>MDD in the last year</b>         |                |               |                |
| No                                  | 1964 (97.1%)   | 2336 (94.3%)  | 4300 (95.6%)   |
| Yes                                 | 58 (2.9%)      | 142 (5.7%)    | 200 (4.4%)     |
| <b>Self-reported general health</b> |                |               |                |
| Excellent                           | 443 (19.7%)    | 564 (20.6%)   | 1007 (20.2%)   |
| Good                                | 1549 (68.8%)   | 1828 (66.8%)  | 3377 (67.7%)   |
| Moderate                            | 245 (10.9%)    | 332 (12.1%)   | 577 (11.6%)    |
| Poor                                | 15 (0.7%)      | 11 (0.4%)     | 26 (0.5%)      |
| <b>Napping</b>                      |                |               |                |
| No                                  | 1309 (61.5%)   | 1986 (76.9%)  | 3295 (69.9%)   |
| Yes                                 | 819 (38.5%)    | 598 (23.1%)   | 1417 (30.1%)   |
| <b>Time in bed (h) †</b>            | 8.5 (0.9)      | 8.7 (0.8)     | 8.6 (0.8)      |
| <b>Sleep duration (h) †</b>         | 7.0 (1.1)      | 6.9 (1.1)     | 6.9 (1.1)      |
| <b>CRP (mg/l)*</b>                  | 1.9 (1.3-3.2)  | 2.0 (1.3-3.5) | 2.0 (1.3-3.4)  |

Results were presented as † mean (SD), \* median (IQR) and the rest N(%). BMI: Body Mass Index; SBP: Systolic Blood Pressure; MDD: Major Depressive Disorder; CRP: C-reactive protein.

1  
2  
3 The unadjusted geometric means of CRP were 2.53 (2.44-2.63) mg/l and 2.20 (2.15-  
4 2.26) mg/l for those who reported napping and no napping, respectively. Table 2  
5 shows differences in  $\log_e$  CRP according to report of napping. After adjustment for  
6 age and sex, daytime napping was associated with 10% higher CRP levels [ $\beta$ = 0.10,  
7 95%CI (0.05, 0.15),  $p < 0.001$ ]. With further adjustment for socio-economic status,  
8 health-related behaviors, physical health and night time sleep, the association was  
9 attenuated but remained borderline significant [ $\beta$ = 0.05, 95%CI (0.00, 0.10),  
10  $p = 0.048$ ]. Table 3 shows the multivariable-adjusted geometric means of CRP. The  
11 geometric means of CRP levels were 2.38 (2.29-2.47) mg/l and 2.26 (2.21-2.32) mg/l  
12 for those who reported napping and no napping, respectively. When analyses were  
13 stratified by sex, the associations between the above napping measure and CRP levels  
14 were only significant among women.  
15  
16  
17  
18  
19  
20  
21  
22  
23  
24  
25  
26  
27  
28  
29

30 The unadjusted geometric means of CRP for those who reported spending <6, 6-8, 8-  
31 10 and >10 hours in bed at night were 3.70 (2.48-5.53), 2.25 (2.15-2.35), 2.29 (2.23-  
32 2.35) and 2.84 (2.52-3.19) mg/l, respectively. After adjustment for age and sex,  
33 spending <6h and >10h in bed were associated with 51% and 17% increase in CRP  
34 levels, respectively (table 2). After full adjustments, long time spent in bed was  
35 associated with 12% increase in CRP levels while the association between short time  
36 in bed and  $\log_e$  CRP was not significant. The geometric means of CRP levels among  
37 those who spent >10h and <6h in bed were 2.57 (2.30-2.87) and 3.00 (2.04-4.40)  
38 mg/l, respectively, higher than those who spent 6-8h in bed [2.28 (2.19-2.38) mg/l].  
39 Night time sleep duration was not associated with  $\log_e$  CRP. Repeating the analyses  
40 restricted to individuals with CRP levels below 10 mg/L did not change the results.  
41  
42  
43  
44  
45  
46  
47  
48  
49  
50  
51  
52  
53  
54  
55  
56  
57  
58  
59  
60

Table 2 Linear regression on sleep and log<sub>e</sub>CRP in the EPIC-Norfolk cohort study

|                              | All [ β (95% CI)]  |                   | Men [ β (95% CI)] |                   | Women [ β (95% CI)] |         |                                     |
|------------------------------|--------------------|-------------------|-------------------|-------------------|---------------------|---------|-------------------------------------|
|                              | Model A            | Model B           |                   | Model A           | Model B             | Model A | Model B                             |
| <b>Napping (4712)</b>        |                    |                   | 2128              |                   |                     | 2584    |                                     |
| No (n=3295)                  | Reference          |                   | 1309              |                   |                     | 1986    |                                     |
| Yes (n=1417)                 | 0.10***[0.05,0.15] | 0.05*[0.00,0.10]  | 819               | 0.08*[0.01,0.15]  | 0.03[-0.03,0.10]    | 598     | 0.12***[0.06,0.19] 0.07*[0.00,0.13] |
| <b>Time in bed (4476)</b>    |                    |                   | 2036              |                   |                     | 2440    |                                     |
| <6h (n=13)                   | 0.51*[0.11,0.91]   | 0.27[-0.11,0.66]  | 7                 | 0.26[-0.30,0.82]  | 0.18[-0.37,0.73]    | 6       | 0.79**[0.22,1.37] 0.43[-0.12,0.97]  |
| 6-8h (n=1101)                | Reference          |                   | 620               | Reference         |                     | 481     | Reference                           |
| 8-10h (n=3208)               | -0.01[-0.06,0.04]  | 0[-0.05,0.05]     | 1342              | -0.03[-0.10,0.04] | -0.01[-0.09,0.06]   | 1866    | 0[-0.07,0.07] 0.02[-0.05,0.09]      |
| >10h (n=154)                 | 0.17**[0.05,0.29]  | 0.12*[0.00,0.24]  | 67                | 0.18[-0.02,0.37]  | 0.14[-0.05,0.33]    | 87      | 0.17*[0.00,0.33] 0.11[-0.05,0.26]   |
| P                            | 0.001              | 0.09              |                   | 0.11              | 0.35                |         | 0.01 0.23                           |
| <b>Sleep duration (4795)</b> |                    |                   | 2173              |                   |                     | 2622    |                                     |
| <6h (n=1232)                 | 0[-0.04,0.05]      | -0.02[-0.07,0.02] | 476               | -0.01[-0.09,0.06] | -0.05[-0.13,0.02]   | 756     | 0.02[-0.04,0.08] -0.01[-0.07,0.05]  |
| 6-8h (n=3154)                | Reference          |                   | 1483              | Reference         |                     | 1671    | Reference                           |
| >8h (n=409)                  | 0.04[-0.03,0.12]   | 0[-0.07,0.08]     | 214               | 0.08[-0.03,0.19]  | 0.02[-0.08,0.13]    | 195     | -0.01[-0.11,0.10] -0.01[-0.11,0.09] |
| p                            | 0.57               | 0.59              |                   | 0.28              | 0.31                |         | 0.86 0.95                           |

Model A: age, sex; Model B: age, sex, social class, education, marital status, BMI, physical activity, smoking, alcohol, self-reported health, pre-existing diseases, SBP, hypnotic use, major depressive disorder, and in women only HRT use. The sleep measures were mutually adjusted in model B. Results were presented as β coefficients (95%CI) of linear regression models using log<sub>e</sub>CRP as the outcome.

\*p<0.05 \*\* p<0.01 \*\*\*p<0.001

Table 3 Geometric means (95% CI) of CRP (mg/l) by sleep in the EPIC-Norfolk cohort study

|                              | All                  |                    | Men  |                    | Women             |         |                      |                    |
|------------------------------|----------------------|--------------------|------|--------------------|-------------------|---------|----------------------|--------------------|
|                              | Model A              | Model B            |      | Model A            | Model B           | Model A | Model B              |                    |
| <b>Napping (4712)</b>        |                      |                    | 2128 |                    |                   | 2584    |                      |                    |
| No (n=3295)                  | 2.23 [2.17, 2.28]*** | 2.26 [2.21, 2.32]* | 1309 | 2.18 [2.09, 2.27]* | 2.22 [2.13, 2.31] | 1986    | 2.27 [2.20, 2.35]*** | 2.30 [2.23, 2.37]* |
| Yes (n=1417)                 | 2.47 [2.37, 2.57]    | 2.38 [2.29, 2.47]  | 819  | 2.36 [2.24, 2.49]  | 2.29 [2.18, 2.41] | 598     | 2.57 [2.43, 2.73]    | 2.45 [2.31, 2.59]  |
| <b>Time in bed (4476)</b>    |                      |                    | 2036 |                    |                   | 2440    |                      |                    |
| <6h (n=13)                   | 3.82 [2.56, 5.69]*   | 3.00 [2.04, 4.40]  | 7    | 2.97 [1.70, 5.21]  | 2.73 [1.58, 4.72] | 6       | 5.09 [2.87, 9.01]**  | 3.46 [2.01, 5.93]  |
| 6-8h (n=1101)                | 2.30 [2.20, 2.40]    | 2.28 [2.18, 2.38]  | 620  | 2.29 [2.16, 2.43]  | 2.27 [2.14, 2.41] | 481     | 2.30 [2.16, 2.45]    | 2.28 [2.14, 2.42]  |
| 8-10h (n=3208)               | 2.27 [2.21, 2.33]    | 2.29 [2.23, 2.34]  | 1342 | 2.22 [2.14, 2.32]  | 2.24 [2.15, 2.33] | 1866    | 2.31 [2.23, 2.38]    | 2.32 [2.25, 2.39]  |
| >10h (n=154)                 | 2.73 [2.43, 3.06]**  | 2.57 [2.30, 2.87]* | 67   | 2.74 [2.28, 3.28]  | 2.61 [2.19, 3.11] | 87      | 2.72 [2.34, 3.17]*   | 2.50 [2.17, 2.89]  |
| <b>Sleep duration (4795)</b> |                      |                    | 2173 |                    |                   | 2622    |                      |                    |
| <6h (n=1232)                 | 2.28 [2.18, 2.37]    | 2.24 [2.15, 2.33]  | 476  | 2.19 [2.05, 2.35]  | 2.14 [2.00, 2.28] | 756     | 2.34 [2.23, 2.46]    | 2.30 [2.19, 2.41]  |
| 6-8h (n=3154)                | 2.27 [2.21, 2.33]    | 2.29 [2.24, 2.35]  | 1483 | 2.22 [2.14, 2.31]  | 2.26 [2.17, 2.34] | 1671    | 2.30 [2.23, 2.38]    | 2.32 [2.25, 2.40]  |
| >8h (n=409)                  | 2.36 [2.20, 2.53]    | 2.30 [2.15, 2.46]  | 214  | 2.41 [2.18, 2.66]  | 2.30 [2.09, 2.54] | 195     | 2.29 [2.07, 2.53]    | 2.29 [2.09, 2.52]  |

Model A: age, sex; Model B: age, sex, social class, education, marital status, BMI, physical activity, smoking, alcohol, self-reported health, pre-existing diseases, SBP, hypnotic use, major depressive disorder, and in women only HRT use. The sleep measures were mutually adjusted in model B. Results were presented as geometric means (95%CI) of CRP (mg/l).

Subgroup analysis investigated differences in these associations by age, sex, social class, smoking, BMI, physical activity and pre-existing diseases (Table 4). These data suggested that the association between napping and CRP levels was stronger for those who were older as compared to those who were younger (p for interaction = 0.007). In addition, the association was more pronounced for extremes of time spent in bed at night (p for interaction=0.01) (Figure 1).

Table 4 The association between log<sub>e</sub> CRP and napping or time spent in bed at night, by subgroups

|                              | Napping (Reference: No)        |              | Time spent in bed at night (reference: 6-8h) |              |       |              |        |              |
|------------------------------|--------------------------------|--------------|----------------------------------------------|--------------|-------|--------------|--------|--------------|
|                              | Yes                            | [β (95% CI)] | 0-6h                                         | [β (95% CI)] | 8-10h | [β (95% CI)] | >10h   | [β (95% CI)] |
| <b>Age</b>                   | <b>p for interaction=0.007</b> |              | p for interaction=0.66                       |              |       |              |        |              |
| <70                          | 0                              | [-0.06,0.06] | 0.14                                         | [-0.25,0.52] | 0     | [-0.06,0.06] | 0.16*  | [0.01,0.32]  |
| >70                          | 0.09**                         | [0.02,0.15]  | 0.02                                         | [-0.59,0.63] | 0.03  | [-0.05,0.11] | 0.12   | [-0.04,0.28] |
| <b>Sex</b>                   | p for interaction=0.87         |              | p for interaction=0.82                       |              |       |              |        |              |
| Men                          | 0.04                           | [-0.02,0.11] | 0.07                                         | [-0.40,0.53] | -0    | [-0.08,0.06] | 0.16   | [-0.03,0.35] |
| Women                        | 0.05                           | [-0.01,0.11] | 0.15                                         | [-0.33,0.62] | 0.02  | [-0.04,0.08] | 0.1    | [-0.04,0.23] |
| <b>Social class</b>          | p for interaction=0.38         |              | p for interaction=0.31                       |              |       |              |        |              |
| Higher                       | 0.03                           | [-0.03,0.08] | 0.15                                         | [-0.27,0.57] | 0.01  | [-0.05,0.06] | 0.19** | [0.05,0.33]  |
| Lower                        | 0.07                           | [-0.01,0.14] | 0.08                                         | [-0.45,0.61] | 0     | [-0.08,0.09] | 0      | [-0.18,0.19] |
| <b>Smoking</b>               | p for interaction=0.5          |              | p for interaction=0.55                       |              |       |              |        |              |
| Current or former smokers    | 0.01                           | [-0.05,0.08] | 0.12                                         | [-0.33,0.57] | -0    | [-0.10,0.05] | 0.12   | [-0.04,0.29] |
| Never smoked                 | 0.06*                          | [0.01,0.12]  | 0.11                                         | [-0.37,0.60] | 0.03  | [-0.03,0.09] | 0.11   | [-0.04,0.26] |
| <b>BMI</b>                   | p for interaction=0.73         |              | p for interaction=0.30                       |              |       |              |        |              |
| Lower                        | 0.06                           | [-0.00,0.12] | -0.15                                        | [-0.76,0.46] | 0.04  | [-0.03,0.10] | 0.18*  | [0.02,0.34]  |
| Higher                       | 0.07*                          | [0.01,0.14]  | 0.36                                         | [-0.05,0.77] | -0    | [-0.10,0.04] | 0.09   | [-0.07,0.25] |
| <b>Physical activity</b>     | p for interaction=0.48         |              | p for interaction=0.41                       |              |       |              |        |              |
| Inactive                     | 0.06*                          | [0.00,0.12]  | 0.28                                         | [-0.14,0.71] | 0.02  | [-0.04,0.08] | 0.13   | [-0.00,0.26] |
| Active                       | 0.02                           | [-0.05,0.09] | -0.13                                        | [-0.65,0.38] | -0    | [-0.10,0.05] | 0.08   | [-0.14,0.29] |
| <b>Pre-existing diseases</b> | p for interaction=0.05         |              | p for interaction=0.08                       |              |       |              |        |              |
| Yes                          | 0.05                           | [-0.25,0.35] | N/A                                          |              | 0.19  | [-0.19,0.56] | 0.81** | [0.21,1.41]  |
| No                           | 0.05*                          | [0.01,0.10]  | 0.11                                         | [-0.23,0.45] | 0.02  | [-0.03,0.07] | 0.08   | [-0.04,0.20] |

The model adjusted for age, sex, social class, education, marital status and BMI.

Results were presented as β coefficients of linear regression models using logCRP as the outcome.

\*p<0.05 \*\* p<0.01 \*\*\*p<0.001



## Discussion

Our findings from more than 4000 older-aged English adults suggest that daytime napping was independently associated with higher CRP levels. Those who reported napping had 10% higher CRP levels after adjustment for age and sex. The association was attenuated but remained statistically significant after adjustment for all the covariates. A U-shaped association was observed between time spent in bed at night and CRP levels, though only the effect of long time spent in bed was statistically significant. The napping-CRP associations were more pronounced amongst extremes of time spent in bed at night. No association was found between sleep duration and CRP levels.

To our knowledge, this is the first study to report an association between habitual daytime napping and inflammation. This gives biological insights to the health impact of daytime napping proposed by previous studies.<sup>4, 24</sup> Our study benefits from a large population-based sample, and a wide range of covariates available for adjustment. Although only moderate effect size was detected, this preliminary finding at population level provides an interesting perspective and implies the need for further physiological studies. There are several limitations. Similar to most previous population studies,<sup>24, 25</sup> daytime napping was self-reported as yes or no. It was suggested that power naps ( naps< 30min) can be largely beneficial,<sup>2,26</sup> while naps>30min can cause sleep inertia and are not recommended.<sup>26</sup> Without detailed report of napping duration, we were unable to differentiate the effects of power naps from excessive napping. Other sleep disorders (e.g. sleep apnea) that might have led to daytime sleepiness were not assessed, so the possibility of residual confounding by these sleep disorders can not be ruled out. Moreover, reported sleep may be a marker

1  
2  
3 of distress levels,<sup>27</sup> which has been linked with CRP levels.<sup>28</sup> However, evaluation of  
4  
5 sleep in the primary care setting relies on self-reported data from patients, and also the  
6  
7 association remained after adjustment for MDD. Another limitation of this study is  
8  
9 that associations are based on a single measurement of CRP. However, the intra-  
10  
11 individual variability of CRP measurements is similar to that of other physiologic  
12  
13 measures such as blood pressure and cholesterol levels, and a single measurement of  
14  
15 CRP has been shown to predict a range of health outcomes.<sup>30,31</sup> Besides, previous  
16  
17 study has reported no diurnal variation of CRP concentrations.<sup>31</sup> Notably, while the  
18  
19 assessment of napping preceded the CRP measures, baseline CRP level was not  
20  
21 measured and there is no information on changes in CRP over time. We were  
22  
23 therefore unable to distinguish between napping as a risk factor for, or as an early  
24  
25 marker of, increased inflammatory levels. Finally, the current analysis was restricted  
26  
27 to the 5018 participants with complete data on CRP and at least one of the sleep  
28  
29 measures. Compared to the other participants from the baseline cohort (N=25,639),  
30  
31 the present sample were 4 years younger, more likely to be of higher social class and  
32  
33 higher education levels. Therefore, our findings have limited generalizability to  
34  
35 populations with lower socioeconomic status.  
36  
37  
38  
39  
40

41  
42 The present study suggested that daytime napping and long time spent in bed at night  
43  
44 were associated with higher CRP levels. The observed effect size was similar to  
45  
46 previous report on sleep duration and CRP levels,<sup>10</sup> and the increase in CRP levels  
47  
48 associated with napping was similar to that associated with 5-year increase in age.<sup>19</sup>  
49  
50 While there are no other studies with which to directly compare our findings, the  
51  
52 current study is in line with existing evidence on the increased cardiovascular,  
53  
54 metabolic and mortality risks among those who take naps, found both by other studies  
55  
56 and in our study population.<sup>6,7,33,34</sup> Meanwhile, a Greek cohort study suggested that  
57  
58  
59  
60

1  
2  
3 siesta might help to reduce coronary mortality through a stress-releasing mechanism  
4  
5 in healthy working men.<sup>34</sup> We also found the association between daytime napping  
6  
7 and increased CRP levels only significant among participants over 70 years old when  
8  
9 analysis was stratified by age. Daytime napping might have different implications for  
10  
11 health among different age groups, and this needs to be considered by future studies.  
12  
13 Several studies suggested that the association between sleep and inflammation was  
14  
15 only observed in women.<sup>14,18</sup> Consistent with these findings, the association between  
16  
17 napping and increased CRP levels was only significant in women, although test for  
18  
19 interaction was not statistically significant. The reason for this is unclear, and the  
20  
21 gender disparities of sleep physiology need further exploration.  
22  
23  
24

25  
26 Time spent in bed was rarely studied in relation to CRP concentrations, but long sleep  
27  
28 duration has been associated with increased CRP levels.<sup>10,12</sup> Since epidemiology  
29  
30 studies have used mixed ways to define sleep duration, the associations between long  
31  
32 sleep and inflammation found by some previous studies might actually reflect the  
33  
34 effects of long time spent in bed, which was associated with poor general health.<sup>16</sup>  
35  
36 We found no association between sleep duration and CRP levels. This is consistent  
37  
38 with findings from the Wisconsin Sleep Cohort Study, which showed no association  
39  
40 between CRP and sleep duration, measured both objectively and subjectively.<sup>14</sup>  
41  
42 Meanwhile, previous studies have found both short and long sleep duration to be  
43  
44 associated with increased CRP levels.<sup>13, 14</sup> Recently, a longitudinal study suggested  
45  
46 that each hour per night decrease in sleep duration was associated with 8.1% higher  
47  
48 average levels of CRP over a 5-year period.<sup>35</sup> The different correlations with serum  
49  
50 CRP levels between the two sleep quantity measures need to be considered by future  
51  
52 studies. Interestingly, the association between napping and CRP levels was more  
53  
54 pronounced amongst extremes of time in bed. It is possible that extremes of time  
55  
56  
57  
58  
59  
60

1  
2  
3 spent in bed at night partly reflected disturbed night-time sleep, and thereby added to  
4  
5 the association for daytime napping. While the complex inter-relationship between  
6  
7 night time and daytime sleep is yet to be confirmed, the present study suggested a  
8  
9 need for a thorough consideration of both night time and daytime sleep in future  
10  
11 studies.  
12

13  
14  
15 It has been suggested that sleep deprivation is related to the activation of the  
16  
17 autonomic nervous system and increased catecholamines, and subsequently stimulate  
18  
19 the release of inflammatory mediators.<sup>36</sup> It is unclear biologically why daytime  
20  
21 napping was associated with increased levels of inflammatory markers. One possible  
22  
23 explanation is through a rise in blood pressure or heart rate upon awakening from a  
24  
25 nap, which might be followed by increased endothelial shear stress and the production  
26  
27 of inflammatory mediators.<sup>37</sup> Alternatively, daytime napping could be the  
28  
29 consequence of unnoticed night time sleep disturbance (e.g. sleep apnea) or sleep  
30  
31 deprivation, which have been linked with systemic inflammation.<sup>36,38,39</sup> Sleep apnea  
32  
33 was not measured in the current study, but the association between daytime napping  
34  
35 and serum CRP levels remained after adjustment for BMI and SBP, two strong  
36  
37 correlates of sleep apnea.  
38  
39  
40  
41

42  
43 In the United Kingdom, daytime napping is not part of the cultural norm. It is  
44  
45 plausible that those who reported daytime napping and long time spent in bed may  
46  
47 represent a population with underlying ill health, and inflammation could be an early  
48  
49 sign of these health problems. Although the association between daytime napping and  
50  
51 CRP concentrations remained after adjustment for pre-existing diseases, we did find it  
52  
53 more pronounced among the older participants, and there might be more existing  
54  
55 health problems among this population. Further studies are needed to determine  
56  
57  
58  
59  
60

1  
2  
3 whether daytime napping is a cause for systemic inflammation, or if it is a symptom  
4  
5 or consequence of disturbed sleep at night or underlying health problems.  
6  
7

## 8 9 **Conclusions**

10  
11  
12 In summary, we found for the first time that daytime napping was associated with  
13 increased CRP levels in a population-based older aged English cohort. The  
14 association between daytime napping and CRP levels was more pronounced among  
15 older people, and among those who spent extremes of time in bed at night. While the  
16 present study provides new insights into the biological effects of daytime napping,  
17 causality can not be established from an observational study. Daytime napping might  
18 be useful as an independent indicator of people who are at underlying health risk or  
19 who suffer from disturbed sleep at night. Future physiological studies are needed to  
20 gain better understanding of the association.  
21  
22  
23  
24  
25  
26  
27  
28  
29  
30  
31  
32  
33  
34  
35  
36  
37  
38  
39  
40  
41  
42  
43  
44  
45  
46  
47  
48  
49  
50  
51  
52  
53  
54  
55  
56  
57  
58  
59  
60

## Acknowledgement

We thank all study participants, general practitioners and the EPIC-Norfolk study team for their contribution.

**Funding statement:** The design and conduct of the EPIC-Norfolk study and collection and management of the data was supported by programme grants from the Medical Research Council UK (G9502233, G0300128) and Cancer Research UK (C865/A2883). YL is supported by the Cambridge Overseas Trust. FPC leads the Sleep Health & Society Programme at the University of Warwick supported, in part, by the University of Warwick RDF and IAS. It has received funding by the NHS National Workforce Projects and the Economic & Social Research Council (ES/K002910/1).

## Authors' contributions

The work presented here was carried out in collaboration between all authors. YL and SA analyzed these data and wrote the manuscript with co-authors. YL, SA, NWJW, FPC, PGS, CB and KTK discussed the analysis, interpretation and presentation of these data. RL performed all data management and record linkage. RL and KTK are on the management team of EPIC-Norfolk population study and contributed substantially to acquisition of data. KTK is a principal investigator in the EPIC-Norfolk study. All authors provided detailed comments on the draft, and revised the manuscript critically. All authors read and approved the final manuscript.

## Competing interests

None

1  
2  
3 **Data Sharing Statement:**  
4

5  
6 No additional data available  
7  
8  
9  
10  
11  
12  
13  
14  
15  
16  
17  
18  
19  
20  
21  
22  
23  
24  
25  
26  
27  
28  
29  
30  
31  
32  
33  
34  
35  
36  
37  
38  
39  
40  
41  
42  
43  
44  
45  
46  
47  
48  
49  
50  
51  
52  
53  
54  
55  
56  
57  
58  
59  
60

For peer review only

## References

- 1 Milner C, Cote KA. Benefits of napping in healthy adults: impact of nap length, time of day, age, and experience with napping. *J Sleep Res* 2009;**18**:272–81.
- 2 Bursztyn M, Stessman J. The siesta and mortality: twelve years of prospective observations in 70-year-olds. *Sleep* 2005;**28**:345–7.
- 3 Jung K-I, Song C-H, Ancoli-Israel S, *et al.* Gender differences in nighttime sleep and daytime napping as predictors of mortality in older adults: the Rancho Bernardo study. *Sleep Med* 2013;**14**:12–9.
- 4 Tanabe N, Iso H, Seki N, *et al.* Daytime napping and mortality, with a special reference to cardiovascular disease: the JACC study. *Int J Epidemiol* 2010;**39**:233–43.
- 5 Xu Q, Song Y, Hollenbeck A, *et al.* Day napping and short night sleeping are associated with higher risk of diabetes in older adults. *Diabetes Care* 2010;**33**:78–83.
- 6 Leng Y, Wainwright NWJ, Cappuccio FP, *et al.* Daytime Napping and the Risk of All-Cause and Cause-Specific Mortality: A 13-Year Follow-up of a British Population. *Am J Epidemiol* 2014;**179**:1115–24.
- 7 Mullington JM, Simpson NS, Meier-Ewert HK, *et al.* Sleep loss and inflammation. *Best Pract Res Clin Endocrinol Metab* 2010;**24**:775–84.
- 8 Meier-Ewert HK, Ridker PM, Rifai N, *et al.* Effect of sleep loss on C-reactive protein, an inflammatory marker of cardiovascular risk. *J Am Coll Cardiol* 2004;**43**:678–83.
- 9 Jackowska M, Kumari M, Steptoe A. Sleep and biomarkers in the English Longitudinal Study of Ageing: associations with C-reactive protein, fibrinogen, dehydroepiandrosterone sulfate and hemoglobin. *Psychoneuroendocrinology* 2013;**38**:1484–93.
- 10 Patel SR, Zhu X, Storfer-Isser A, *et al.* Sleep duration and biomarkers of inflammation. *Sleep* 2009;**32**:200–4.
- 11 Dowd JB, Goldman N, Weinstein M. Sleep duration, sleep quality, and biomarkers of inflammation in a Taiwanese population. *Ann Epidemiol* 2011;**21**:799–806.
- 12 Grandner MA, Buxton OM, Jackson N, *et al.* Extreme sleep durations and increased C-reactive protein: effects of sex and ethn racial group. *Sleep* 2013;**36**:769–779E.



- 1  
2  
3 13 Miller MA, Kandala N-B, Kivimaki M, *et al.* Gender differences in the cross-sectional relationships between sleep duration and markers of inflammation: Whitehall II study. *Sleep* 2009;**32**:857–64.
- 4  
5  
6  
7 14 Taheri S, Austin D, Lin L, *et al.* Correlates of serum C-reactive protein (CRP)--no association with sleep duration or sleep disordered breathing. *Sleep* 2007;**30**:991–6.
- 8  
9  
10  
11  
12 15 Faraut B, Boudjeltia KZ, Dyzma M, *et al.* Benefits of napping and an extended duration of recovery sleep on alertness and immune cells after acute sleep restriction. *Brain Behav Immun* 2011;**25**:16–24.
- 13  
14  
15  
16 16 Leng Y, Wainwright NWJ, Cappuccio FP, *et al.* Self-reported sleep patterns in a British population cohort. *Sleep Med* 2014;**15**:295–302.
- 17  
18  
19  
20 17 Suarez EC. Self-reported symptoms of sleep disturbance and inflammation, coagulation, insulin resistance and psychosocial distress: evidence for gender disparity. *Brain Behav Immun* 2008;**22**:960–8.
- 21  
22  
23  
24 18 Day N, Oakes SA, Luben R, *et al.* EPIC-Norfolk: study design and characteristics of the cohort. *Br J Cancer* 1999;**80**:95–103.
- 25  
26  
27  
28 19 Ahmadi-Abhari S, Luben RN, Wareham NJ, *et al.* Distribution and determinants of C-reactive protein in the older adult population: European Prospective Investigation into Cancer-Norfolk study. *Eur J Clin Invest* 2013;**43**:899–911.
- 29  
30  
31  
32  
33 20 Wareham NJ, Jakes RW, Rennie KL, *et al.* Validity and repeatability of a simple index derived from the short physical activity questionnaire used in the European Prospective Investigation into Cancer and Nutrition (EPIC) study. *Public Health Nutr* 2003;**6**:407–13.
- 34  
35  
36  
37  
38 21 Heslop P, Smith GD, Metcalfe C, *et al.* Sleep duration and mortality: The effect of short or long sleep duration on cardiovascular and all-cause mortality in working men and women. *Sleep Med* 2002;**3**:305–14.
- 39  
40  
41  
42  
43 22 Hublin C, Partinen M, Koskenvuo M, *et al.* Sleep and mortality: a population-based 22-year follow-up study. *Sleep* 2007;**30**:1245–53.
- 44  
45  
46  
47 23 Bursztyn M. The siesta in the elderly: risk factor for mortality? *Arch Intern Med* 1999;**159**:1582–6.
- 48  
49  
50  
51 24 Cohen-Mansfield J, Perach R. Sleep duration, nap habits, and mortality in older persons. *Sleep* 2012;**35**:1003–9.
- 52  
53  
54 25 Ruggiero JS, Redeker NS. Effects of Napping on Sleepiness and Sleep-Related Performance Deficits in Night-Shift Workers: A Systematic Review. *Biol Res Nurs* 2014;**16**:134–42.
- 55  
56  
57  
58 26 Tassi P, Muzet A. Sleep inertia. *Sleep Med Rev* 2000;**4**:341–53.
- 59  
60

- 1  
2  
3 27 Lavie P. Self-reported sleep duration--what does it mean? *J Sleep Res*  
4 2009;**18**:385–6.  
5  
6 28 Wium-Andersen MK, Ørsted DD, Nielsen SF, *et al.* Elevated C-reactive  
7 protein levels, psychological distress, and depression in 73, 131 individuals.  
8 *JAMA Psychiatry* 2013;**70**:176–84.  
9  
10 29 Allin KH, Bojesen SE, Nordestgaard BG. Baseline C-reactive protein is  
11 associated with incident cancer and survival in patients with cancer. *J Clin*  
12 *Oncol* 2009;**27**:2217–24.  
13  
14 30 Kaptoge S, Di Angelantonio E, Lowe G, *et al.* C-reactive protein concentration  
15 and risk of coronary heart disease, stroke, and mortality: an individual  
16 participant meta-analysis. *Lancet* 2010;**375**:132–40.  
17  
18 31 Meier-Ewert HK, Ridker PM, Rifai N, *et al.* Absence of diurnal variation of C-  
19 reactive protein concentrations in healthy human subjects. *Clin Chem*  
20 2001;**47**:426–30.  
21  
22 32 Campos H, Siles X. Siesta and the risk of coronary heart disease: results from a  
23 population-based, case-control study in Costa Rica. *Int J Epidemiol*  
24 2000;**29**:429–37.  
25  
26 33 Lam K-BH, Jiang CQ, Thomas GN, *et al.* Napping is associated with increased  
27 risk of type 2 diabetes: the Guangzhou Biobank Cohort Study. *Sleep*  
28 2010;**33**:402–7.  
29  
30 34 Naska A, Oikonomou E, Trichopoulou A, *et al.* Siesta in healthy adults and  
31 coronary mortality in the general population. *Arch Intern Med* 2007;**167**:296–  
32 301.  
33  
34 35 Ferrie JE, Kivimäki M, Akbaraly TN, *et al.* Associations Between Change in  
35 Sleep Duration and Inflammation: Findings on C-reactive Protein and  
36 Interleukin 6 in the Whitehall II Study. *Am J Epidemiol* 2013;**178**:956–61.  
37  
38 36 Mullington JM, Haack M, Toth M, *et al.* Cardiovascular, inflammatory, and  
39 metabolic consequences of sleep deprivation. *Prog Cardiovasc Dis*  
40 2009;**51**:294–302.  
41  
42 37 Chiu J-J, Usami S, Chien S. Vascular endothelial responses to altered shear  
43 stress: pathologic implications for atherosclerosis. *Ann Med* 2009;**41**:19–28.  
44  
45 38 Liukkonen T, Räsänen P, Ruokonen A, *et al.* C-reactive protein levels and  
46 sleep disturbances: observations based on the Northern Finland 1966 Birth  
47 Cohort study. *Psychosom Med* 2007;**69**:756–61.  
48  
49 39 Svensson M, Venge P, Janson C, *et al.* Relationship between sleep-disordered  
50 breathing and markers of systemic inflammation in women from the general  
51 population. *J Sleep Res* 2012;**21**:147–54.  
52  
53  
54  
55  
56  
57  
58  
59  
60

1  
2  
3  
4  
5  
6  
7  
8  
9  
10  
11  
12  
13  
14  
15  
16  
17  
18  
19  
20  
21  
22  
23  
24  
25  
26  
27  
28  
29  
30  
31  
32  
33  
34  
35  
36  
37  
38  
39  
40  
41  
42  
43  
44  
45  
46  
47  
48  
49  
50  
51  
52  
53  
54  
55  
56  
57  
58  
59  
60

## Figure 1: Serum levels of C-reactive protein by napping and time in bed \*

\* Values are geometric mean CRP (mg/l) across categories adjusted for age, body mass index, physical activity, smoking, alcohol intake, social class, education, marital status, major depressive disorder, self-reported health, pre-existing diseases, systolic blood pressure, hypnotic drug use, and in women only, postmenopausal hormone replacement therapy. The sleep measures were mutually adjusted. Vertical bars represent 95% confidence intervals.

peer review only

1  
2  
3  
4  
5  
6  
7  
8  
9  
10  
11  
12  
13  
14  
15  
16  
17  
18  
19  
20  
21  
22  
23  
24  
25  
26  
27  
28  
29  
30  
31  
32  
33  
34  
35  
36  
37  
38  
39  
40  
41  
42  
43  
44  
45  
46  
47  
48  
49  
50  
51  
52  
53  
54  
55  
56  
57  
58  
59  
60

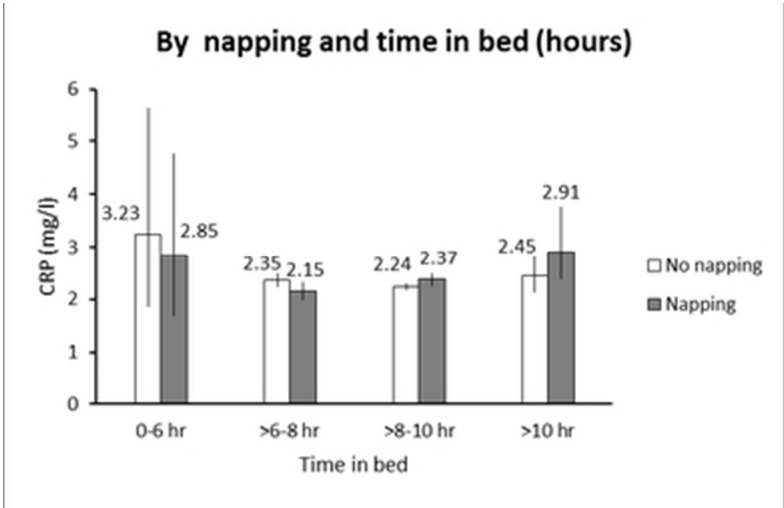

33x21mm (300 x 300 DPI)

er review only

**STROBE 2007 (v4) checklist of items to be included in reports of observational studies in epidemiology\***  
**Checklist for cohort, case-control, and cross-sectional studies (combined)**

| Section/Topic             | Item # | Recommendation                                                                                                                                                                                                                                                                                                                                                                                                                                                         | Reported on page # |
|---------------------------|--------|------------------------------------------------------------------------------------------------------------------------------------------------------------------------------------------------------------------------------------------------------------------------------------------------------------------------------------------------------------------------------------------------------------------------------------------------------------------------|--------------------|
| Title and abstract        | 1      | (a) Indicate the study's design with a commonly used term in the title or the abstract                                                                                                                                                                                                                                                                                                                                                                                 | 1                  |
|                           |        | (b) Provide in the abstract an informative and balanced summary of what was done and what was found                                                                                                                                                                                                                                                                                                                                                                    | 2                  |
| <b>Introduction</b>       |        |                                                                                                                                                                                                                                                                                                                                                                                                                                                                        |                    |
| Background/rationale      | 2      | Explain the scientific background and rationale for the investigation being reported                                                                                                                                                                                                                                                                                                                                                                                   | 5                  |
| Objectives                | 3      | State specific objectives, including any pre-specified hypotheses                                                                                                                                                                                                                                                                                                                                                                                                      | 6                  |
| <b>Methods</b>            |        |                                                                                                                                                                                                                                                                                                                                                                                                                                                                        |                    |
| Study design              | 4      | Present key elements of study design early in the paper                                                                                                                                                                                                                                                                                                                                                                                                                | 6-7                |
| Setting                   | 5      | Describe the setting, locations, and relevant dates, including periods of recruitment, exposure, follow-up, and data collection                                                                                                                                                                                                                                                                                                                                        | 6-7                |
| Participants              | 6      | (a) <i>Cohort study</i> —Give the eligibility criteria, and the sources and methods of selection of participants. Describe methods of follow-up<br><i>Case-control study</i> —Give the eligibility criteria, and the sources and methods of case ascertainment and control selection. Give the rationale for the choice of cases and controls<br><i>Cross-sectional study</i> —Give the eligibility criteria, and the sources and methods of selection of participants | 6-7                |
|                           |        | (b) <i>Cohort study</i> —For matched studies, give matching criteria and number of exposed and unexposed<br><i>Case-control study</i> —For matched studies, give matching criteria and the number of controls per case                                                                                                                                                                                                                                                 |                    |
| Variables                 | 7      | Clearly define all outcomes, exposures, predictors, potential confounders, and effect modifiers. Give diagnostic criteria, if applicable                                                                                                                                                                                                                                                                                                                               | 7-8                |
| Data sources/ measurement | 8*     | For each variable of interest, give sources of data and details of methods of assessment (measurement). Describe comparability of assessment methods if there is more than one group                                                                                                                                                                                                                                                                                   | 7                  |
| Bias                      | 9      | Describe any efforts to address potential sources of bias                                                                                                                                                                                                                                                                                                                                                                                                              | 8-9                |
| Study size                | 10     | Explain how the study size was arrived at                                                                                                                                                                                                                                                                                                                                                                                                                              | 8                  |
| Quantitative variables    | 11     | Explain how quantitative variables were handled in the analyses. If applicable, describe which groupings were chosen and why                                                                                                                                                                                                                                                                                                                                           | 8-9                |
| Statistical methods       | 12     | (a) Describe all statistical methods, including those used to control for confounding                                                                                                                                                                                                                                                                                                                                                                                  | 9                  |
|                           |        | (b) Describe any methods used to examine subgroups and interactions                                                                                                                                                                                                                                                                                                                                                                                                    | 9                  |
|                           |        | (c) Explain how missing data were addressed                                                                                                                                                                                                                                                                                                                                                                                                                            | 8                  |
|                           |        | (d) <i>Cohort study</i> —If applicable, explain how loss to follow-up was addressed<br><i>Case-control study</i> —If applicable, explain how matching of cases and controls was addressed                                                                                                                                                                                                                                                                              | 8                  |

|                          |     |                                                                                                                                                                                                              |       |
|--------------------------|-----|--------------------------------------------------------------------------------------------------------------------------------------------------------------------------------------------------------------|-------|
|                          |     | <i>Cross-sectional study</i> —If applicable, describe analytical methods taking account of sampling strategy                                                                                                 |       |
|                          |     | (e) Describe any sensitivity analyses                                                                                                                                                                        | 9     |
| <b>Results</b>           |     |                                                                                                                                                                                                              |       |
| Participants             | 13* | (a) Report numbers of individuals at each stage of study—eg numbers potentially eligible, examined for eligibility, confirmed eligible, included in the study, completing follow-up, and analysed            | 10    |
|                          |     | (b) Give reasons for non-participation at each stage                                                                                                                                                         |       |
|                          |     | (c) Consider use of a flow diagram                                                                                                                                                                           |       |
| Descriptive data         | 14* | (a) Give characteristics of study participants (eg demographic, clinical, social) and information on exposures and potential confounders                                                                     | 10    |
|                          |     | (b) Indicate number of participants with missing data for each variable of interest                                                                                                                          | 13    |
|                          |     | (c) <i>Cohort study</i> —Summarise follow-up time (eg, average and total amount)                                                                                                                             |       |
| Outcome data             | 15* | <i>Cohort study</i> —Report numbers of outcome events or summary measures over time                                                                                                                          |       |
|                          |     | <i>Case-control study</i> —Report numbers in each exposure category, or summary measures of exposure                                                                                                         |       |
|                          |     | <i>Cross-sectional study</i> —Report numbers of outcome events or summary measures                                                                                                                           | 8     |
| Main results             | 16  | (a) Give unadjusted estimates and, if applicable, confounder-adjusted estimates and their precision (eg, 95% confidence interval). Make clear which confounders were adjusted for and why they were included | 12    |
|                          |     | (b) Report category boundaries when continuous variables were categorized                                                                                                                                    |       |
|                          |     | (c) If relevant, consider translating estimates of relative risk into absolute risk for a meaningful time period                                                                                             |       |
| Other analyses           | 17  | Report other analyses done—eg analyses of subgroups and interactions, and sensitivity analyses                                                                                                               | 15    |
| <b>Discussion</b>        |     |                                                                                                                                                                                                              |       |
| Key results              | 18  | Summarise key results with reference to study objectives                                                                                                                                                     | 16    |
| Limitations              | 19  | Discuss limitations of the study, taking into account sources of potential bias or imprecision. Discuss both direction and magnitude of any potential bias                                                   | 16-17 |
| Interpretation           | 20  | Give a cautious overall interpretation of results considering objectives, limitations, multiplicity of analyses, results from similar studies, and other relevant evidence                                   | 17-19 |
| Generalisability         | 21  | Discuss the generalisability (external validity) of the study results                                                                                                                                        | 17    |
| <b>Other information</b> |     |                                                                                                                                                                                                              |       |
| Funding                  | 22  | Give the source of funding and the role of the funders for the present study and, if applicable, for the original study on which the present article is based                                                | 21    |

\*Give information separately for cases and controls in case-control studies and, if applicable, for exposed and unexposed groups in cohort and cross-sectional studies.

**Note:** An Explanation and Elaboration article discusses each checklist item and gives methodological background and published examples of transparent reporting. The STROBE checklist is best used in conjunction with this article (freely available on the Web sites of PLoS Medicine at <http://www.plosmedicine.org/>, Annals of Internal Medicine at <http://www.annals.org/>, and Epidemiology at <http://www.epidem.com/>). Information on the STROBE Initiative is available at [www.strobe-statement.org](http://www.strobe-statement.org).

# BMJ Open

## Daytime napping, sleep duration and serum C-reactive protein: a population-based cohort study

|                                 |                                                                                                                                                                                                                                                                                                                                                                                                                                                                                                                                                                                                                                                                                                                                                                                |
|---------------------------------|--------------------------------------------------------------------------------------------------------------------------------------------------------------------------------------------------------------------------------------------------------------------------------------------------------------------------------------------------------------------------------------------------------------------------------------------------------------------------------------------------------------------------------------------------------------------------------------------------------------------------------------------------------------------------------------------------------------------------------------------------------------------------------|
| Journal:                        | <i>BMJ Open</i>                                                                                                                                                                                                                                                                                                                                                                                                                                                                                                                                                                                                                                                                                                                                                                |
| Manuscript ID:                  | bmjopen-2014-006071.R1                                                                                                                                                                                                                                                                                                                                                                                                                                                                                                                                                                                                                                                                                                                                                         |
| Article Type:                   | Research                                                                                                                                                                                                                                                                                                                                                                                                                                                                                                                                                                                                                                                                                                                                                                       |
| Date Submitted by the Author:   | 04-Sep-2014                                                                                                                                                                                                                                                                                                                                                                                                                                                                                                                                                                                                                                                                                                                                                                    |
| Complete List of Authors:       | Leng, Yue; University of Cambridge, Department of Public Health and Primary Care<br>Ahmadi-Abhari, Sara; University of Cambridge, Department of Public Health and Primary Care<br>Wainwright, Nicholas; University of Cambridge, UK, Department of Public Health and Primary Care, Strangeways Research Laboratory,<br>Cappuccio, Francesco; University of Warwick, Warwick Medical School, Clinical Sciences Research Institute<br>Surtees, Paul; University of Cambridge, Department of Public Health and Primary Care<br>Luben, Robert; University of Cambridge, Department of Public Health and Primary Care<br>Brayne, Carol; University of Cambridge, Institute of Public Health<br>Khaw, Kay-Tee; University of Cambridge, Department of Public Health and Primary Care |
| <b>Primary Subject Heading</b>: | Epidemiology                                                                                                                                                                                                                                                                                                                                                                                                                                                                                                                                                                                                                                                                                                                                                                   |
| Secondary Subject Heading:      | Public health                                                                                                                                                                                                                                                                                                                                                                                                                                                                                                                                                                                                                                                                                                                                                                  |
| Keywords:                       | Sleep, Napping, C-reactive protein, Inflammation, Population                                                                                                                                                                                                                                                                                                                                                                                                                                                                                                                                                                                                                                                                                                                   |
|                                 |                                                                                                                                                                                                                                                                                                                                                                                                                                                                                                                                                                                                                                                                                                                                                                                |

SCHOLARONE™  
Manuscripts

## Daytime napping, sleep duration and serum C-reactive protein: a population-based cohort study

Yue Leng, M,Phil<sup>1\*</sup>, Sara Ahmadi-Abhari, MD<sup>1</sup>, Nick W.J. Wainwright, PhD<sup>1</sup>, Francesco P. Cappuccio, FRCP, FAHA<sup>2</sup>, Paul G. Surtees, PhD<sup>1</sup>, Robert Luben, MSc<sup>1</sup>, Carol Brayne, MD, FRCP<sup>3</sup>, Kay-Tee Khaw, MD, FRCP<sup>1</sup>

### Affiliations

<sup>1</sup> Department of Public Health and Primary Care, Strangeways Research Laboratory, University of Cambridge, Cambridge, UK

<sup>2</sup> Division of Mental Health & Wellbeing, Warwick Medical School, University of Warwick, Coventry, UK

<sup>3</sup> Department of Public Health and Primary Care, Institute of Public Health, University of Cambridge, Cambridge, UK

Word count: 3195 (Main text, excluding title page, abstract, references, figures and tables);

---

\* Address for correspondence: Yue Leng, Department of Public Health and Primary Care, Strangeways Research Laboratory, University of Cambridge, Cambridge CB1 8RN, UK (Email: [y1411@medschl.cam.ac.uk](mailto:y1411@medschl.cam.ac.uk); Tel: +44(0)1223748686)



## ABSTRACT

**Objectives:** To explore whether daytime napping and sleep duration are linked to serum C-reactive protein (CRP), a pro-inflammatory marker, in an older-aged British population.

**Design:** Cross-sectional study

**Setting:** European Prospective Investigation into Cancer and Nutrition (EPIC)-Norfolk study.

**Participants:** A total of 5018 men and women aged 48-92 years reported their sleep habits and had serum CRP levels measured.

**Outcome and measures:** CRP was measured (mg/l) during 2006-2011 in fresh blood samples using high-sensitivity methods. Participants reported napping habits during 2002-2004, and reported sleep quantity during 2006-2007. Multivariable linear regression models were used to examine the association between napping and log-transformed CRP, and geometric mean CRP levels were calculated.

**Results:** After adjustment for age and sex, those who reported napping had 10% higher CRP levels compared to those not napping. The association was attenuated but remained borderline significant [ $\beta = 0.05$  (95% CI: 0.00, 0.10)] after further adjustment for social class, education, marital status, body mass index, physical activity, smoking, alcohol intake, self-reported health, pre-existing diseases, systolic blood pressure, hypnotic drug use, depression and in women only hormone replacement therapy use. The geometric means (95%CI) of CRP levels were 2.38 (2.29-2.47) mg/l and 2.26 (2.21-2.32) mg/l for those who reported napping and no

1  
2  
3 napping, respectively. A U-shaped association was observed between time spent in  
4  
5 bed at night and CRP levels, and night time sleep duration was not associated with  
6  
7 serum CRP levels. The association between napping and CRP was stronger for older  
8  
9 participants, and amongst extremes of time spent in bed at night.  
10

11  
12 **Conclusions:** Daytime napping was associated with increased CRP levels in an older-  
13  
14 aged British population. Further studies are needed to determine whether daytime  
15  
16 napping is a cause for systemic inflammation, or if it is a symptom or consequence of  
17  
18 underlying health problems.  
19  
20

21  
22 **Keywords:** *Sleep; Napping; C-reactive protein; Inflammation; Population*  
23  
24  
25  
26  
27  
28  
29  
30  
31  
32  
33  
34  
35  
36  
37  
38  
39  
40  
41  
42  
43  
44  
45  
46  
47  
48  
49  
50  
51  
52  
53  
54  
55  
56  
57  
58  
59  
60

## Article summary

### Article focus:

- Daytime napping has been associated with cardiovascular disease and mortality, but the biological implication of napping is unclear.
- To our knowledge, this is the first population-based study to examine the association between daytime napping and serum CRP levels.
- We also studied both time spent in bed at night and sleep duration in relation to CRP levels.

### Key messages:

- Daytime napping was associated with 10% higher CRP levels, independent of age and sex.
- The association was more pronounced in women, older participants, and amongst extremes of time spent in bed at night.
- Sleep duration was not associated with CRP levels.

### Strengths and limitations:

- Our study benefits from a large population-based sample, measures of both daytime and night time sleep, and a wide range of covariates available for adjustment.
- Sleep habits were self-reported
- The purpose and duration of napping was not reported, and sleep apnea was not measured.

## Introduction

Recently there has been growing interest in studying the health implications of daytime napping. Although the benefits of napping on wakefulness performance have been widely documented, especially among shift workers,<sup>1</sup> a few studies also reported an increased health risk associated with daytime napping. Specifically, daytime napping has been associated with increased mortality,<sup>2,3</sup> cardiovascular,<sup>4</sup> and diabetes risk.<sup>5</sup> We have recently found a 32% increased mortality risk among those who napped for  $\geq 1$ h/ day in a middle- to older- aged English population.<sup>6</sup> While it is not yet clear whether daytime napping is a cause or symptom of the increased health risk, examination of the physiological correlations of napping will help to gain understanding of the napping-health relationship.

One important proposed pathway for the association between sleep and health outcomes is through inflammation.<sup>7</sup> C-reactive protein (CRP), a general marker for inflammation, was first suggested to increase after sleep deprivation in an experimental study.<sup>8</sup> Since then, there have been increasing numbers of observational studies which produced mixed findings on the association. Long sleep duration has been associated with increasing CRP among men,<sup>9</sup> women,<sup>10</sup> as well as in the sexes combined sample,<sup>11,12</sup> with long sleep being brought up as a potential marker of underlying inflammatory illness.<sup>11</sup> By contrast, Miller et al<sup>13</sup> found an association between short sleep duration and increased CRP only in women. Taheri et al suggested no significant association between CRP levels and sleep duration in the Wisconsin Sleep Cohort Study.<sup>14</sup>

Despite the growing interest into the inflammatory correlates of night time sleep, there has been limited evidence on the physiological effects of daytime napping.

1  
2  
3 Experimental study has reported a beneficial effect of napping on immune cells  
4 following acute sleep restriction.<sup>15</sup> However, habitual daytime napping as a lifestyle  
5 might relate to different physiological effects compared to napping as a form of  
6 recovery sleep, and understanding the link between habitual napping and  
7 inflammation could help to clarify the association observed for napping and the  
8 increased mortality risk. Moreover, a number of changes in sleep from middle to older  
9 adulthood have been reported, including an advanced circadian pacemaker, decreased  
10 sleep efficiency and increased daytime sleepiness.<sup>16,17,18</sup> Therefore we set out to  
11 examine the associations between daytime napping and serum CRP levels in the  
12 European Prospective Investigation into Cancer (EPIC)-Norfolk cohort, a middle- to  
13 older- aged British population . In addition, we have previously reported the different  
14 implications between sleep duration and time spent in bed,<sup>19</sup> so confirmatory analysis  
15 was also conducted to test the associations separately for sleep duration and time  
16 spent in bed at night. Given the gender disparity suggested by some previous  
17 studies,<sup>14, 18</sup> we explored sex differences in the associations.

## 37 **Methods**

### 41 **Participants**

42 The design and study methods of EPIC-Norfolk have been described  
43 previously.<sup>21</sup> Briefly, 25,639 men and women were recruited into the EPIC-Norfolk  
44 study during 1993-1997 using general practice age-sex registers, and attended the  
45 baseline health check. These participants were then followed up for two further health  
46 examinations from 1996 to 2000 and from 2006 to 2011. In between these health  
47 examinations, participants were sent questionnaires for completion and returned by  
48  
49  
50  
51  
52  
53  
54  
55  
56  
57  
58  
59  
60

1  
2  
3 post. The Norwich District Ethics Committee approved the study and all participants  
4  
5 gave signed informed consent.  
6  
7

### 8 9 **Sleep Measures**

10  
11 Habitual daytime napping was ascertained during 2002-2004, by asking participants  
12  
13 the question “Do you normally take a nap during the day?”.  
14  
15

16  
17 “Night time sleep duration” and “Time spent in bed at night” were ascertained during  
18  
19 2006-2007, by asking participants “On average, about how many hours have you slept  
20  
21 each night?”; “At what time do you normally get up?” and “At what time do you  
22  
23 normally go to bed?”. “Time spent in bed” was derived from the differences between  
24  
25 rise time and bedtime, and as a weighted mean measure of weekday and weekend  
26  
27 times  $[5/7*(\text{time on a week- day})+ 2/7*(\text{time on a weekend day})]$ .  
28  
29  
30

### 31 32 **CRP**

33  
34  
35 CRP was measured (mg/l) at the third health examination (2006-2011) in fresh blood  
36  
37 samples using high-sensitivity methods using the Siemens Dimension clinical  
38  
39 chemistry analyzer (Siemens Dimension clinical chemistry analyzer, Newark,  
40  
41 Delaware, US), with between batch CV values of 3.1% at 7.86 mg/l, 3.7% at 88.75  
42  
43 mg/l.  
44  
45  
46

### 47 48 **Covariates**

49  
50  
51 Covariates measured closer in time to each measure of sleep were chosen and  
52  
53 included in the models for the corresponding sleep measures. The covariates were  
54  
55 chosen as a priori based on their link with CRP and sleep.<sup>19,22</sup> Social class  
56  
57 (professionals, managerial and technical occupations, skilled workers subdivided into  
58  
59  
60

1  
2  
3 non-manual and manual, partly skilled workers and unskilled manual workers) and  
4  
5 education (highest qualification attained: no qualifications, educated to age 16,  
6  
7 educated to age 18, and educated to degree level) were assessed at the baseline  
8  
9 questionnaire. Body Mass Index (BMI; weight in kilograms divided by height in  
10  
11 meters squared) and Systolic Blood Pressure (SBP) (mmHg) were objectively  
12  
13 assessed through the health examination. The other covariates reported by  
14  
15 questionnaires included: marital status (single, married, widowed, separated and  
16  
17 divorced), physical activity (inactive, moderately inactive, moderately active and  
18  
19 active<sup>23</sup>), smoking status (current, former and non-smokers), alcohol intake (units of  
20  
21 alcohol drunk per week), self-reported general health (excellent, good, moderate or  
22  
23 poor), Major Depressive Disorder (MDD) (Yes/No), pre-existing diseases (including  
24  
25 self-reported stroke, myocardial infarction, diabetes, cancer, asthma, bronchitis, and  
26  
27 emphysema), use of hypnotic drugs (Yes/No), and Hormone Replacement Therapy  
28  
29 (HRT) use.  
30  
31  
32  
33  
34

### 35 **Statistical analysis**

36  
37  
38 Analysis was restricted to those participants with complete data on all covariates. A  
39  
40 total of 5018 participants had complete data on CRP and at least one of the sleep  
41  
42 measures and were included in the analysis.  
43  
44

45  
46 The CRP values were natural-log transformed ( $\log_e$  CRP) to approximate a normal  
47  
48 distribution. Due to the U-shaped relationship reported by previous studies on sleep  
49  
50 duration and health risk,<sup>22,23</sup> and in order to retain sufficient numbers, sleep duration  
51  
52 was categorized into three categories (<6, 6-8, and >8 hours) and time spent in bed  
53  
54 was categorized into four categories (<6, 6-8, 8-10, and >10 hours). Multivariable  
55  
56 linear regression models using  $\log_e$  CRP as the outcome were conducted to examine  
57  
58  
59  
60

1  
2  
3 the associations between each sleep measure (daytime napping [N=4712], time spent  
4 in bed [N=4476] and sleep duration [N=4795]) and CRP levels. For each sleep  
5 variable, results were presented: A. adjusted for age, sex; B. further adjusted for social  
6 class, education and marital status, BMI, physical activity, smoking and alcohol  
7 intake, depression, self-reported health, pre-existing diseases, SBP, hypnotic drug use  
8 and in women only postmenopausal HRT. The sleep measures were mutually adjusted  
9 in model B. Since the associations for sleep duration and time in bed might be non-  
10 linear (approximately U-shaped), the  $\beta$  coefficients (with 95% confidence intervals)  
11 were calculated with 6-8h being the reference groups for the examination of sleep  
12 quantitative measures. For analysis by napping habit, the no napping category was  
13 chosen as reference group. Results were presented for the whole sample and for men  
14 and women separately.

15  
16  
17  
18  
19  
20  
21  
22  
23  
24  
25  
26  
27  
28  
29  
30  
31 Geometric-mean (95% confidence interval, CI) serum CRP values (mg/l) were  
32 calculated by exponentiating crude and adjusted-least square mean (95% CI)  $\log_e$  CRP  
33 values. Finally, subgroup analysis was conducted for the main sleep variable of  
34 interest, napping and time spent in bed at night, to explore the effects of potential  
35 effect modifiers (including age, sex, social class, smoking, BMI, physical activity and  
36 pre-existing diseases). These analyses were adjusted for age, sex, social class,  
37 education, marital status and BMI. The two by two interactions between napping  
38 habit, time in bed, and sleep duration were examined using the likelihood ratio test.  
39  
40  
41  
42  
43  
44  
45  
46  
47  
48  
49  
50  
51  
52  
53  
54  
55  
56  
57  
58  
59  
60  
Sensitivity analysis All statistical tests were two-sided, and a p value <0.05 was  
considered statistically significant. Analyses were implemented in STATA 12.0.



## Results

Characteristics of the study sample (2267 men, 2751 women) are shown in table 1. The mean age of the participants was 69.5 (ranging from 48 to 92) years old. More than 60% of the sample came from non-manual social class, and 48.0% were former or current smokers. A total of 38.5% men and 23.1% women reported daytime napping. The average time people spent in bed every night was  $8.6 \pm 0.8$  h and the average sleep duration was  $6.9 \pm 1.1$  h. Serum CRP ranged from 0.1-116.6 mg/l, with a median of 2.0 mg/l (interquartile range 2.07 mg/l).

Table 1 Baseline characteristics of the EPIC-Norfolk participants

|                                     | Men            | Women         | Total          |
|-------------------------------------|----------------|---------------|----------------|
| <b>Age (years) †</b>                | 70.5 (8.0)     | 68.6 (7.9)    | 69.5 (8.0)     |
| <b>Social class</b>                 |                |               |                |
| Non-manual                          | 1495 (66.5%)   | 1885 (69.3%)  | 3380 (68.0%)   |
| Manual                              | 753 (33.5%)    | 836 (30.7%)   | 1589 (32.0%)   |
| <b>Education</b>                    |                |               |                |
| Lower                               | 686 (30.3%)    | 1148 (41.7%)  | 1834 (36.6%)   |
| Higher                              | 1580 (69.7%)   | 1602 (58.3%)  | 3182 (63.4%)   |
| <b>Marital status</b>               |                |               |                |
| Single                              | 60 (2.8%)      | 99 (3.8%)     | 159 (3.3%)     |
| Married                             | 1929 (90.4%)   | 2017 (77.6%)  | 3946 (83.4%)   |
| Others                              | 144 (6.8%)     | 484 (18.6%)   | 628 (13.3%)    |
| <b>Smoking</b>                      |                |               |                |
| Current smoker                      | 147 (6.5%)     | 194 (7.1%)    | 341 (6.8%)     |
| Former smoker                       | 1178 (52.1%)   | 881 (32.1%)   | 2059 (41.2%)   |
| Never smoked                        | 936 (41.4%)    | 1666 (60.8%)  | 2602 (52.0%)   |
| <b>Physical activity</b>            |                |               |                |
| Inactive                            | 624 (29.0%)    | 677 (25.9%)   | 1301 (27.4%)   |
| Moderately inactive                 | 534 (24.9%)    | 877 (33.6%)   | 1411 (29.6%)   |
| Moderately active                   | 497 (23.1%)    | 613 (23.5%)   | 1110 (23.3%)   |
| Active                              | 493 (23.0%)    | 447 (17.1%)   | 940 (19.7%)    |
| <b>BMI (kg/m<sup>2</sup>) †</b>     | 26.7 (3.1)     | 26.0 (4.0)    | 26.3 (3.6)     |
| <b>SBP (mmHg) †</b>                 | 134.9 (16.9)   | 129.9 (17.3)  | 132.2 (17.3)   |
| <b>Alcohol (units)*</b>             | 8.0 (3.0-15.0) | 3.0 (1.5-8.0) | 5.0 (2.0-11.0) |
| <b>Pre-existing diseases</b>        |                |               |                |
| No                                  | 2095 (97.5%)   | 2499 (98.9%)  | 4594 (98.2%)   |
| Yes                                 | 53 (2.5%)      | 29 (1.1%)     | 82 (1.8%)      |
| <b>Hypnotic use</b>                 |                |               |                |
| No                                  | 2236 (98.6%)   | 2717 (98.8%)  | 4953 (98.7%)   |
| Yes                                 | 31 (1.4%)      | 34 (1.2%)     | 65 (1.3%)      |
| <b>MDD in the last year</b>         |                |               |                |
| No                                  | 1964 (97.1%)   | 2336 (94.3%)  | 4300 (95.6%)   |
| Yes                                 | 58 (2.9%)      | 142 (5.7%)    | 200 (4.4%)     |
| <b>Self-reported general health</b> |                |               |                |
| Excellent                           | 443 (19.7%)    | 564 (20.6%)   | 1007 (20.2%)   |
| Good                                | 1549 (68.8%)   | 1828 (66.8%)  | 3377 (67.7%)   |
| Moderate                            | 245 (10.9%)    | 332 (12.1%)   | 577 (11.6%)    |
| Poor                                | 15 (0.7%)      | 11 (0.4%)     | 26 (0.5%)      |
| <b>Napping</b>                      |                |               |                |
| No                                  | 1309 (61.5%)   | 1986 (76.9%)  | 3295 (69.9%)   |
| Yes                                 | 819 (38.5%)    | 598 (23.1%)   | 1417 (30.1%)   |
| <b>Time in bed (h) †</b>            | 8.5 (0.9)      | 8.7 (0.8)     | 8.6 (0.8)      |
| <b>Sleep duration (h) †</b>         | 7.0 (1.1)      | 6.9 (1.1)     | 6.9 (1.1)      |
| <b>CRP (mg/l)*</b>                  | 1.9 (1.3-3.2)  | 2.0 (1.3-3.5) | 2.0 (1.3-3.4)  |

Results were presented as † mean (SD), \* median (IQR) and the rest N(%). BMI: Body Mass Index; SBP: Systolic Blood Pressure; MDD: Major Depressive Disorder; CRP: C-reactive protein.

1  
2  
3 The unadjusted geometric means of CRP were 2.53 (2.44-2.63) mg/l and 2.20 (2.15-  
4 2.26) mg/l for those who reported napping and no napping, respectively. Table 2  
5 shows differences in  $\log_e$  CRP according to report of napping. After adjustment for  
6 age and sex, daytime napping was associated with 10% higher CRP levels [ $\beta$ = 0.10,  
7 95%CI (0.05, 0.15),  $p < 0.001$ ]. With further adjustment for socio-economic status,  
8 health-related behaviors, physical health and night time sleep, the association was  
9 attenuated but remained borderline significant [ $\beta$ = 0.05, 95%CI (0.00, 0.10),  
10  $p = 0.048$ ]. Table 3 shows the multivariable-adjusted geometric means of CRP. The  
11 geometric means of CRP levels were 2.38 (2.29-2.47) mg/l and 2.26 (2.21-2.32) mg/l  
12 for those who reported napping and no napping, respectively. When analyses were  
13 stratified by sex, the associations between the above napping measure and CRP levels  
14 were only significant among women.  
15  
16  
17  
18  
19  
20  
21  
22  
23  
24  
25  
26  
27  
28  
29

30 The unadjusted geometric means of CRP for those who reported spending <6, 6-8, 8-  
31 10 and >10 hours in bed at night were 3.70 (2.48-5.53), 2.25 (2.15-2.35), 2.29 (2.23-  
32 2.35) and 2.84 (2.52-3.19) mg/l, respectively. After adjustment for age and sex,  
33 spending <6h and >10h in bed were associated with 51% and 17% increase in CRP  
34 levels, respectively (table 2). After full adjustments, long time spent in bed was  
35 associated with 12% increase in CRP levels while the association between short time  
36 in bed and  $\log_e$  CRP was not significant. The geometric means of CRP levels among  
37 those who spent >10h and <6h in bed were 2.57 (2.30-2.87) and 3.00 (2.04-4.40)  
38 mg/l, respectively, higher than those who spent 6-8h in bed [2.28 (2.19-2.38) mg/l].  
39 Night time sleep duration was not associated with  $\log_e$  CRP. Repeating the analyses  
40 restricted to individuals with CRP levels below 10 mg/L did not change the results.  
41  
42  
43  
44  
45  
46  
47  
48  
49  
50  
51  
52  
53  
54  
55  
56  
57  
58  
59  
60

Table 2 Linear regression on sleep and log<sub>e</sub>CRP in the EPIC-Norfolk cohort study

|                              | All [ β (95% CI)]  |                   | Men  | [ β (95% CI)]     |                   | Women | [ β (95% CI)]      |                   |
|------------------------------|--------------------|-------------------|------|-------------------|-------------------|-------|--------------------|-------------------|
|                              | Model A            | Model B           |      | Model A           | Model B           |       | Model A            | Model B           |
| <b>Napping (4712)</b>        |                    |                   | 2128 |                   |                   | 2584  |                    |                   |
| No (n=3295)                  | Reference          |                   | 1309 |                   |                   | 1986  |                    |                   |
| Yes (n=1417)                 | 0.10***[0.05,0.15] | 0.05*[0.00,0.10]  | 819  | 0.08*[0.01,0.15]  | 0.03[-0.03,0.10]  | 598   | 0.12***[0.06,0.19] | 0.07*[0.00,0.13]  |
| <b>Time in bed (4476)</b>    |                    |                   | 2036 |                   |                   | 2440  |                    |                   |
| <6h (n=13)                   | 0.51*[0.11,0.91]   | 0.27[-0.11,0.66]  | 7    | 0.26[-0.30,0.82]  | 0.18[-0.37,0.73]  | 6     | 0.79**[0.22,1.37]  | 0.43[-0.12,0.97]  |
| 6-8h (n=1101)                | Reference          |                   | 620  | Reference         |                   | 481   | Reference          |                   |
| 8-10h (n=3208)               | -0.01[-0.06,0.04]  | 0[-0.05,0.05]     | 1342 | -0.03[-0.10,0.04] | -0.01[-0.09,0.06] | 1866  | 0[-0.07,0.07]      | 0.02[-0.05,0.09]  |
| >10h (n=154)                 | 0.17**[0.05,0.29]  | 0.12*[0.00,0.24]  | 67   | 0.18[-0.02,0.37]  | 0.14[-0.05,0.33]  | 87    | 0.17*[0.00,0.33]   | 0.11[-0.05,0.26]  |
| P                            | 0.001              | 0.09              |      | 0.11              | 0.35              |       | 0.01               | 0.23              |
| <b>Sleep duration (4795)</b> |                    |                   | 2173 |                   |                   | 2622  |                    |                   |
| <6h (n=1232)                 | 0[-0.04,0.05]      | -0.02[-0.07,0.02] | 476  | -0.01[-0.09,0.06] | -0.05[-0.13,0.02] | 756   | 0.02[-0.04,0.08]   | -0.01[-0.07,0.05] |
| 6-8h (n=3154)                | Reference          |                   | 1483 | Reference         |                   | 1671  | Reference          |                   |
| >8h (n=409)                  | 0.04[-0.03,0.12]   | 0[-0.07,0.08]     | 214  | 0.08[-0.03,0.19]  | 0.02[-0.08,0.13]  | 195   | -0.01[-0.11,0.10]  | -0.01[-0.11,0.09] |
| p                            | 0.57               | 0.59              |      | 0.28              | 0.31              |       | 0.86               | 0.95              |

Model A: age, sex; Model B: age, sex, social class, education, marital status, BMI, physical activity, smoking, alcohol, self-reported health, pre-existing diseases, SBP, hypnotic use, major depressive disorder, and in women only HRT use. The sleep measures were mutually adjusted in model B. Results were presented as β coefficients (95%CI) of linear regression models using log<sub>e</sub>CRP as the outcome.

\*p<0.05 \*\* p<0.01 \*\*\*p<0.001

Table 3 Geometric means (95% CI) of CRP (mg/l) by sleep in the EPIC-Norfolk cohort study

|                              | All                  |                    | Men  |                    |                   | Women |                      |                    |
|------------------------------|----------------------|--------------------|------|--------------------|-------------------|-------|----------------------|--------------------|
|                              | Model A              | Model B            |      | Model A            | Model B           |       | Model A              | Model B            |
| <b>Napping (4712)</b>        |                      |                    | 2128 |                    |                   | 2584  |                      |                    |
| No (n=3295)                  | 2.23 [2.17, 2.28]*** | 2.26 [2.21, 2.32]* | 1309 | 2.18 [2.09, 2.27]* | 2.22 [2.13, 2.31] | 1986  | 2.27 [2.20, 2.35]*** | 2.30 [2.23, 2.37]* |
| Yes (n=1417)                 | 2.47 [2.37, 2.57]    | 2.38 [2.29, 2.47]  | 819  | 2.36 [2.24, 2.49]  | 2.29 [2.18, 2.41] | 598   | 2.57 [2.43, 2.73]    | 2.45 [2.31, 2.59]  |
| <b>Time in bed (4476)</b>    |                      |                    | 2036 |                    |                   | 2440  |                      |                    |
| <6h (n=13)                   | 3.82 [2.56, 5.69]*   | 3.00 [2.04, 4.40]  | 7    | 2.97 [1.70, 5.21]  | 2.73 [1.58, 4.72] | 6     | 5.09 [2.87, 9.01]**  | 3.46 [2.01, 5.93]  |
| 6-8h (n=1101)                | 2.30 [2.20, 2.40]    | 2.28 [2.18, 2.38]  | 620  | 2.29 [2.16, 2.43]  | 2.27 [2.14, 2.41] | 481   | 2.30 [2.16, 2.45]    | 2.28 [2.14, 2.42]  |
| 8-10h (n=3208)               | 2.27 [2.21, 2.33]    | 2.29 [2.23, 2.34]  | 1342 | 2.22 [2.14, 2.32]  | 2.24 [2.15, 2.33] | 1866  | 2.31 [2.23, 2.38]    | 2.32 [2.25, 2.39]  |
| >10h (n=154)                 | 2.73 [2.43, 3.06]**  | 2.57 [2.30, 2.87]* | 67   | 2.74 [2.28, 3.28]  | 2.61 [2.19, 3.11] | 87    | 2.72 [2.34, 3.17]*   | 2.50 [2.17, 2.89]  |
| <b>Sleep duration (4795)</b> |                      |                    | 2173 |                    |                   | 2622  |                      |                    |
| <6h (n=1232)                 | 2.28 [2.18, 2.37]    | 2.24 [2.15, 2.33]  | 476  | 2.19 [2.05, 2.35]  | 2.14 [2.00, 2.28] | 756   | 2.34 [2.23, 2.46]    | 2.30 [2.19, 2.41]  |
| 6-8h (n=3154)                | 2.27 [2.21, 2.33]    | 2.29 [2.24, 2.35]  | 1483 | 2.22 [2.14, 2.31]  | 2.26 [2.17, 2.34] | 1671  | 2.30 [2.23, 2.38]    | 2.32 [2.25, 2.40]  |
| >8h (n=409)                  | 2.36 [2.20, 2.53]    | 2.30 [2.15, 2.46]  | 214  | 2.41 [2.18, 2.66]  | 2.30 [2.09, 2.54] | 195   | 2.29 [2.07, 2.53]    | 2.29 [2.09, 2.52]  |

Model A: age, sex; Model B: age, sex, social class, education, marital status, BMI, physical activity, smoking, alcohol, self-reported health, pre-existing diseases, SBP, hypnotic use, major depressive disorder, and in women only HRT use. The sleep measures were mutually adjusted in model B. Results were presented as geometric means (95%CI) of CRP (mg/l).

\*p<0.05 \*\* p<0.01 \*\*\*p<0.001; p values were based on comparisons using no napping or 6-8h as the reference category.

Subgroup analysis investigated differences in these associations by age, sex, social class, smoking, BMI, physical activity and pre-existing diseases (Table 4). These data suggested that the association between napping and CRP levels was stronger for those who were older as compared to those who were younger (p for interaction = 0.007). In addition, the association was more pronounced for extremes of time spent in bed at night (p for interaction=0.01) (Figure 1).

Table 4 The association between log<sub>e</sub> CRP and napping or time spent in bed at night, by subgroups

|                              | Napping (Reference: No)        |              | Time spent in bed at night (reference: 6-8h) |              |       |              |        |              |
|------------------------------|--------------------------------|--------------|----------------------------------------------|--------------|-------|--------------|--------|--------------|
|                              | Yes                            | [β (95% CI)] | 0-6h                                         | [β (95% CI)] | 8-10h | [β (95% CI)] | >10h   | [β (95% CI)] |
| <b>Age</b>                   | <b>p for interaction=0.007</b> |              | p for interaction=0.66                       |              |       |              |        |              |
| <70                          | 0                              | [-0.06,0.06] | 0.14                                         | [-0.25,0.52] | 0     | [-0.06,0.06] | 0.16*  | [0.01,0.32]  |
| >70                          | 0.09**                         | [0.02,0.15]  | 0.02                                         | [-0.59,0.63] | 0.03  | [-0.05,0.11] | 0.12   | [-0.04,0.28] |
| <b>Sex</b>                   | p for interaction=0.87         |              | p for interaction=0.82                       |              |       |              |        |              |
| Men                          | 0.04                           | [-0.02,0.11] | 0.07                                         | [-0.40,0.53] | -0    | [-0.08,0.06] | 0.16   | [-0.03,0.35] |
| Women                        | 0.05                           | [-0.01,0.11] | 0.15                                         | [-0.33,0.62] | 0.02  | [-0.04,0.08] | 0.1    | [-0.04,0.23] |
| <b>Social class</b>          | p for interaction=0.38         |              | p for interaction=0.31                       |              |       |              |        |              |
| Higher                       | 0.03                           | [-0.03,0.08] | 0.15                                         | [-0.27,0.57] | 0.01  | [-0.05,0.06] | 0.19** | [0.05,0.33]  |
| Lower                        | 0.07                           | [-0.01,0.14] | 0.08                                         | [-0.45,0.61] | 0     | [-0.08,0.09] | 0      | [-0.18,0.19] |
| <b>Smoking</b>               | p for interaction=0.5          |              | p for interaction=0.55                       |              |       |              |        |              |
| Current or former smokers    | 0.01                           | [-0.05,0.08] | 0.12                                         | [-0.33,0.57] | -0    | [-0.10,0.05] | 0.12   | [-0.04,0.29] |
| Never smoked                 | 0.06*                          | [0.01,0.12]  | 0.11                                         | [-0.37,0.60] | 0.03  | [-0.03,0.09] | 0.11   | [-0.04,0.26] |
| <b>BMI</b>                   | p for interaction=0.73         |              | p for interaction=0.30                       |              |       |              |        |              |
| Lower                        | 0.06                           | [-0.00,0.12] | -0.15                                        | [-0.76,0.46] | 0.04  | [-0.03,0.10] | 0.18*  | [0.02,0.34]  |
| Higher                       | 0.07*                          | [0.01,0.14]  | 0.36                                         | [-0.05,0.77] | -0    | [-0.10,0.04] | 0.09   | [-0.07,0.25] |
| <b>Physical activity</b>     | p for interaction=0.48         |              | p for interaction=0.41                       |              |       |              |        |              |
| Inactive                     | 0.06*                          | [0.00,0.12]  | 0.28                                         | [-0.14,0.71] | 0.02  | [-0.04,0.08] | 0.13   | [-0.00,0.26] |
| Active                       | 0.02                           | [-0.05,0.09] | -0.13                                        | [-0.65,0.38] | -0    | [-0.10,0.05] | 0.08   | [-0.14,0.29] |
| <b>Pre-existing diseases</b> | p for interaction=0.05         |              | p for interaction=0.08                       |              |       |              |        |              |
| Yes                          | 0.05                           | [-0.25,0.35] | N/A                                          |              | 0.19  | [-0.19,0.56] | 0.81** | [0.21,1.41]  |
| No                           | 0.05*                          | [0.01,0.10]  | 0.11                                         | [-0.23,0.45] | 0.02  | [-0.03,0.07] | 0.08   | [-0.04,0.20] |

The model adjusted for age, sex, social class, education, marital status and BMI.

Results were presented as β coefficients of linear regression models using logCRP as the outcome.

\*p<0.05 \*\* p<0.01 \*\*\*p<0.001

## Discussion

Our findings from more than 4000 middle- to older-aged English adults suggest that daytime napping was independently associated with higher CRP levels. Those who reported napping had 10% higher CRP levels after adjustment for age and sex. The association was attenuated but remained statistically significant after adjustment for all the covariates. A U-shaped association was observed between time spent in bed at night and CRP levels, though only the effect of long time spent in bed was statistically significant. The napping-CRP associations were more pronounced amongst extremes of time spent in bed at night. No association was found between sleep duration and CRP levels.

To our knowledge, this is the first study to report an association between habitual daytime napping and inflammation. This gives biological insights to the health impact of daytime napping proposed by previous studies.<sup>4, 24</sup> Our study benefits from a large population-based sample, and a wide range of covariates available for adjustment. Although only moderate effect size was detected in the multivariable model, the possibility of over adjustment can not be excluded, given the complexity of the relationship between sleep and health. Overall, this preliminary finding at population level provides an interesting perspective and implies the need for further physiological studies. There are several limitations. Similar to most previous population studies,<sup>24, 25</sup> daytime napping was self-reported as yes or no. It was suggested that power naps ( naps< 30min) can be largely beneficial,<sup>2,26</sup> while naps>30min can cause sleep inertia and are not recommended.<sup>29</sup> Without detailed report of napping duration, we were unable to differentiate the effects of power naps from excessive napping. Other sleep disorders (e.g. sleep apnea) that might have led

1  
2  
3 to daytime sleepiness were not assessed, so the possibility of residual confounding by  
4 these sleep disorders can not be ruled out. Moreover, reported sleep may be a marker  
5 of distress levels,<sup>30</sup> which has been linked with CRP levels.<sup>31</sup> However, evaluation of  
6 sleep in the primary care setting relies on self-reported data from patients, and also the  
7 association remained after adjustment for MDD. Another limitation of this study is  
8 that associations are based on a single measurement of CRP. However, the intra-  
9 individual variability of CRP measurements is similar to that of other physiologic  
10 measures such as blood pressure and cholesterol levels, and a single measurement of  
11 CRP has been shown to predict a range of health outcomes.<sup>30,31</sup> Besides, previous  
12 study has reported no diurnal variation of CRP concentrations.<sup>34</sup> Notably, while the  
13 assessment of napping preceded the CRP measures, baseline CRP level was not  
14 measured and there is no information on changes in CRP over time. We were  
15 therefore unable to distinguish between napping as a risk factor for, or as an early  
16 marker of, increased inflammatory levels. Finally, the current analysis was restricted  
17 to the 5018 participants with complete data on CRP and at least one of the sleep  
18 measures. Compared to the other participants from the baseline cohort (N=25,639),  
19 the present sample were 4 years younger, more likely to be of higher social class and  
20 higher education levels. Therefore, our findings have limited generalizability to  
21 populations with lower socioeconomic status.  
22  
23  
24  
25  
26  
27  
28  
29  
30  
31  
32  
33  
34  
35  
36  
37  
38  
39  
40  
41  
42  
43  
44  
45

46 The present study suggested that daytime napping and long time spent in bed at night  
47 were associated with higher CRP levels. The observed effect size was similar to  
48 previous report on sleep duration and CRP levels,<sup>10</sup> and the increase in CRP levels  
49 associated with napping was similar to that associated with 5-year increase in age.<sup>22</sup>  
50  
51 While there are no other studies with which to directly compare our findings, the  
52 current study is in line with existing evidence on the increased cardiovascular,  
53  
54  
55  
56  
57  
58  
59  
60



1  
2  
3 metabolic and mortality risks among those who take naps, found both by other studies  
4 and in our study population.<sup>6,7,33,34</sup> Meanwhile, a Greek cohort study suggested that  
5 siesta might help to reduce coronary mortality through a stress-releasing mechanism  
6 in healthy working men.<sup>37</sup> We also found the association between daytime napping  
7 and increased CRP levels only significant among participants over 70 years old when  
8 analysis was stratified by age. Daytime napping might have different implications for  
9 health among different age groups, and this needs to be considered by future studies.  
10 Notably, daytime napping or daytime sleepiness has been associated with the  
11 occurrence of degenerative diseases such as Parkinson's disease and dementia in the  
12 older population.<sup>38,39</sup> It has also been reported that chronic inflammation, as indicated  
13 by an elevation in plasma interleukin (IL)-6 levels, was predictive of future  
14 Parkinson's disease.<sup>40</sup> In the current study, daytime napping was associated with a  
15 higher serum CRP level, while information on other inflammatory biomarkers was not  
16 obtained. Future studies with more complete measures of chronic inflammation might  
17 help to clarify the link between daytime napping and degenerative diseases in the  
18 elderly. Several studies suggested that the association between sleep and  
19 inflammation was only observed in women.<sup>14,18</sup> Consistent with these findings, the  
20 association between napping and increased CRP levels was only significant in  
21 women, although test for interaction was not statistically significant. The reason for  
22 this is unclear, and the gender disparities of sleep physiology need further exploration.  
23  
24  
25  
26  
27  
28  
29  
30  
31  
32  
33  
34  
35  
36  
37  
38  
39  
40  
41  
42  
43  
44  
45  
46  
47  
48  
49  
50  
51  
52  
53  
54  
55  
56  
57  
58  
59  
60

Time spent in bed was rarely studied in relation to CRP concentrations, but long sleep duration has been associated with increased CRP levels.<sup>10,12</sup> Since epidemiology studies have used mixed ways to define sleep duration, the associations between long sleep and inflammation found by some previous studies might actually reflect the effects of long time spent in bed, which was associated with poor general health.<sup>19</sup>

1  
2  
3 Indeed, long time spent in bed has been associated with poorer general health, pre-  
4 existing health problems, and more frequent use of sleep medications in the EPIC-  
5 Norfolk cohort.<sup>19</sup> Therefore, the observed association between long time spent in bed  
6 and increased CRP levels might be explained by declining health status. We found no  
7 association between sleep duration and CRP levels. This is consistent with findings  
8 from the Wisconsin Sleep Cohort Study, which showed no association between CRP  
9 and sleep duration, measured both objectively and subjectively.<sup>14</sup> Meanwhile,  
10 previous studies have found both short and long sleep duration to be associated with  
11 increased CRP levels.<sup>13, 14</sup> Recently, a longitudinal study suggested that each hour per  
12 night decrease in sleep duration was associated with 8.1% higher average levels of  
13 CRP over a 5-year period.<sup>41</sup> The different correlations with serum CRP levels  
14 between the two sleep quantity measures need to be considered by future studies.  
15 Interestingly, the association between napping and CRP levels was more pronounced  
16 amongst extremes of time in bed. It is possible that extremes of time spent in bed at  
17 night partly reflected disturbed night-time sleep, and thereby added to the association  
18 for daytime napping. While the complex inter-relationship between night time and  
19 daytime sleep is yet to be confirmed, the present study suggested a need for a  
20 thorough consideration of both night time and daytime sleep in future studies.  
21  
22  
23  
24  
25  
26  
27  
28  
29  
30  
31  
32  
33  
34  
35  
36  
37  
38  
39  
40  
41  
42

43  
44 It has been suggested that sleep deprivation is related to the activation of the  
45 autonomic nervous system and increased catecholamines, and subsequently stimulate  
46 the release of inflammatory mediators.<sup>42</sup> It is unclear biologically why daytime  
47 napping was associated with increased levels of inflammatory markers. One possible  
48 explanation is through a rise in blood pressure or heart rate upon awakening from a  
49 nap, which might be followed by increased endothelial shear stress and the production  
50 of inflammatory mediators.<sup>43</sup> Alternatively, daytime napping could be the  
51  
52  
53  
54  
55  
56  
57  
58  
59  
60

1  
2  
3 consequence of unnoticed night time sleep disturbance (e.g. sleep apnea) or sleep  
4 deprivation, which have been linked with systemic inflammation.<sup>42,44,45</sup> Sleep apnea  
5  
6  
7 was not measured in the current study, but the association between daytime napping  
8  
9  
10 and serum CRP levels remained after adjustment for BMI and SBP, two strong  
11  
12 correlates of sleep apnea.  
13

14  
15 In the United Kingdom, daytime napping is not part of the cultural norm. It is  
16  
17 plausible that those who reported daytime napping and long time spent in bed may  
18  
19 represent a population with underlying ill health, and inflammation could be an early  
20  
21 sign of these health problems. Although the association between daytime napping and  
22  
23 CRP concentrations remained after adjustment for pre-existing diseases, we did find it  
24  
25 more pronounced among the older participants, and there might be more existing  
26  
27 health problems among this population. Further studies are needed to determine  
28  
29 whether daytime napping is a cause for systemic inflammation, or if it is a symptom  
30  
31 or consequence of disturbed sleep at night or underlying health problems.  
32  
33  
34  
35

## 36 **Conclusions**

37  
38  
39 In summary, we found for the first time that daytime napping was associated with  
40  
41 increased CRP levels in a population-based middle- to older aged English cohort. The  
42  
43 association between daytime napping and CRP levels was more pronounced among  
44  
45 older people, and among those who spent extremes of time in bed at night. While the  
46  
47 present study provides new insights into the biological effects of daytime napping,  
48  
49 causality can not be established from an observational study. Daytime napping might  
50  
51 be useful as an independent indicator of people who are at underlying health risk or  
52  
53  
54  
55  
56  
57  
58  
59  
60

1  
2  
3 who suffer from disturbed sleep at night. Future physiological studies are needed to  
4  
5 gain better understanding of the association.  
6  
7  
8  
9

## 10 11 12 **Acknowledgement**

13  
14  
15  
16 We thank all study participants, general practitioners and the EPIC-Norfolk study  
17  
18 team for their contribution.  
19

## 20 21 22 **Competing interests**

23  
24  
25 None  
26  
27

28 **Funding statement:** The design and conduct of the EPIC-Norfolk study and  
29  
30 collection and management of the data was supported by programme grants from the  
31  
32 Medical Research Council UK (G9502233, G0300128) and Cancer Research UK  
33  
34 (C865/A2883). YL is supported by the Cambridge Overseas Trust. FPC leads the  
35  
36 Sleep Health & Society Programme at the University of Warwick supported, in part,  
37  
38 by the University of Warwick RDF and IAS. It has received funding by the NHS  
39  
40 National Workforce Projects and the Economic & Social Research Council  
41  
42 (ES/K002910/1).  
43  
44  
45  
46

## 47 48 **Authors' contributions**

49  
50  
51 The work presented here was carried out in collaboration between all authors. YL and  
52  
53 SA analyzed these data and wrote the manuscript with co-authors. YL, SA, NWJW,  
54  
55 FPC, PGS, CB and KTK discussed the analysis, interpretation and presentation of  
56  
57 these data. RL performed all data management and record linkage. RL and KTK are  
58  
59  
60

1  
2  
3 on the management team of EPIC-Norfolk population study and contributed  
4 substantially to acquisition of data. KTK is a principal investigator in the EPIC-  
5 Norfolk study. All authors provided detailed comments on the draft, and revised the  
6 manuscript critically. All authors read and approved the final manuscript.  
7  
8  
9  
10

11  
12 **Data Sharing:** No additional data available  
13  
14  
15  
16  
17  
18  
19  
20  
21  
22  
23  
24  
25  
26  
27  
28  
29  
30  
31  
32  
33  
34  
35  
36  
37  
38  
39  
40  
41  
42  
43  
44  
45  
46  
47  
48  
49  
50  
51  
52  
53  
54  
55  
56  
57  
58  
59  
60

## Figure 1: Serum levels of C-reactive protein by napping and time in bed \*

\* Values are geometric mean CRP (mg/l) across categories adjusted for age, body mass index, physical activity, smoking, alcohol intake, social class, education, marital status, major depressive disorder, self-reported health, pre-existing diseases, systolic blood pressure, hypnotic drug use, and in women only, postmenopausal hormone replacement therapy. The sleep measures were mutually adjusted. Vertical bars represent 95% confidence intervals.

### References

- 1 Milner C, Cote KA. Benefits of napping in healthy adults: impact of nap length, time of day, age, and experience with napping. *J Sleep Res* 2009;**18**:272–81.
- 2 Bursztyn M, Stessman J. The siesta and mortality: twelve years of prospective observations in 70-year-olds. *Sleep* 2005;**28**:345–7.
- 3 Jung K-I, Song C-H, Ancoli-Israel S, *et al*. Gender differences in nighttime sleep and daytime napping as predictors of mortality in older adults: the Rancho Bernardo study. *Sleep Med* 2013;**14**:12–9.
- 4 Tanabe N, Iso H, Seki N, *et al*. Daytime napping and mortality, with a special reference to cardiovascular disease: the JACC study. *Int J Epidemiol* 2010;**39**:233–43.
- 5 Xu Q, Song Y, Hollenbeck A, *et al*. Day napping and short night sleeping are associated with higher risk of diabetes in older adults. *Diabetes Care* 2010;**33**:78–83.
- 6 Leng Y, Wainwright NWJ, Cappuccio FP, *et al*. Daytime Napping and the Risk of All-Cause and Cause-Specific Mortality: A 13-Year Follow-up of a British Population. *Am J Epidemiol* 2014;**179**:1115–24.
- 7 Mullington JM, Simpson NS, Meier-Ewert HK, *et al*. Sleep loss and inflammation. *Best Pract Res Clin Endocrinol Metab* 2010;**24**:775–84.
- 8 Meier-Ewert HK, Ridker PM, Rifai N, *et al*. Effect of sleep loss on C-reactive protein, an inflammatory marker of cardiovascular risk. *J Am Coll Cardiol* 2004;**43**:678–83.
- 9 Jackowska M, Kumari M, Steptoe A. Sleep and biomarkers in the English Longitudinal Study of Ageing: associations with C-reactive protein, fibrinogen, dehydroepiandrosterone sulfate and hemoglobin. *Psychoneuroendocrinology* 2013;**38**:1484–93.

- 1  
2  
3 10 Patel SR, Zhu X, Storfer-Isser A, *et al.* Sleep duration and biomarkers of  
4 inflammation. *Sleep* 2009;**32**:200–4.  
5  
6 11 Dowd JB, Goldman N, Weinstein M. Sleep duration, sleep quality, and  
7 biomarkers of inflammation in a Taiwanese population. *Ann Epidemiol*  
8 2011;**21**:799–806.  
9  
10 12 Grandner MA, Buxton OM, Jackson N, *et al.* Extreme sleep durations and  
11 increased C-reactive protein: effects of sex and ethnoracial group. *Sleep*  
12 2013;**36**:769–779E.  
13  
14 13 Miller MA, Kandala N-B, Kivimaki M, *et al.* Gender differences in the cross-  
15 sectional relationships between sleep duration and markers of inflammation:  
16 Whitehall II study. *Sleep* 2009;**32**:857–64.  
17  
18 14 Taheri S, Austin D, Lin L, *et al.* Correlates of serum C-reactive protein (CRP)--  
19 no association with sleep duration or sleep disordered breathing. *Sleep*  
20 2007;**30**:991–6.  
21  
22 15 Faraut B, Boudjeltia KZ, Dyzma M, *et al.* Benefits of napping and an extended  
23 duration of recovery sleep on alertness and immune cells after acute sleep  
24 restriction. *Brain Behav Immun* 2011;**25**:16–24.  
25  
26 16 Dijk DJ, Duffy JF, Czeisler CA. Contribution of circadian physiology and sleep  
27 homeostasis to age-related changes in human sleep. *Chronobiol Int*  
28 2000;**17**:285–311.  
29  
30 17 Foley D, Vitiello M, Bliwise D, *et al.* Frequent napping is associated with  
31 excessive daytime sleepiness, depression, pain, and nocturia in older adults. *Am*  
32 *J Geriatr Psychiatry* 2007;**15**:344–50.  
33  
34 18 Ohayon MM, Carskadon M a, Guilleminault C, *et al.* Meta-analysis of  
35 quantitative sleep parameters from childhood to old age in healthy individuals:  
36 developing normative sleep values across the human lifespan. *Sleep*  
37 2004;**27**:1255–73.  
38  
39 19 Leng Y, Wainwright NWJ, Cappuccio FP, *et al.* Self-reported sleep patterns in  
40 a British population cohort. *Sleep Med* 2014;**15**:295–302.  
41  
42 20 Suarez EC. Self-reported symptoms of sleep disturbance and inflammation,  
43 coagulation, insulin resistance and psychosocial distress: evidence for gender  
44 disparity. *Brain Behav Immun* 2008;**22**:960–8.  
45  
46 21 Day N, Oakes SA, Luben R, *et al.* EPIC-Norfolk: study design and  
47 characteristics of the cohort. *Br J Cancer* 1999;**80**:95–103.  
48  
49 22 Ahmadi-Abhari S, Luben RN, Wareham NJ, *et al.* Distribution and  
50 determinants of C-reactive protein in the older adult population: European  
51 Prospective Investigation into Cancer-Norfolk study. *Eur J Clin Invest*  
52 2013;**43**:899–911.  
53  
54  
55  
56  
57  
58  
59  
60

- 1  
2  
3 23 Wareham NJ, Jakes RW, Rennie KL, *et al.* Validity and repeatability of a  
4 simple index derived from the short physical activity questionnaire used in the  
5 European Prospective Investigation into Cancer and Nutrition (EPIC) study.  
6 *Public Health Nutr* 2003;**6**:407–13.  
7  
8  
9 24 Heslop P, Smith GD, Metcalfe C, *et al.* Sleep duration and mortality: The  
10 effect of short or long sleep duration on cardiovascular and all-cause mortality  
11 in working men and women. *Sleep Med* 2002;**3**:305–14.  
12  
13 25 Hublin C, Partinen M, Koskenvuo M, *et al.* Sleep and mortality: a population-  
14 based 22-year follow-up study. *Sleep* 2007;**30**:1245–53.  
15  
16 26 Bursztyn M. The siesta in the elderly: risk factor for mortality? *Arch Intern*  
17 *Med* 1999;**159**:1582–6.  
18  
19  
20 27 Cohen-Mansfield J, Perach R. Sleep duration, nap habits, and mortality in older  
21 persons. *Sleep* 2012;**35**:1003–9.  
22  
23 28 Ruggiero JS, Redeker NS. Effects of Napping on Sleepiness and Sleep-Related  
24 Performance Deficits in Night-Shift Workers: A Systematic Review. *Biol Res*  
25 *Nurs* 2014;**16**:134–42.  
26  
27  
28 29 Tassi P, Muzet A. Sleep inertia. *Sleep Med Rev* 2000;**4**:341–53.  
29  
30 30 Lavie P. Self-reported sleep duration--what does it mean? *J Sleep Res*  
31 2009;**18**:385–6.  
32  
33 31 Wium-Andersen MK, Ørsted DD, Nielsen SF, *et al.* Elevated C-reactive  
34 protein levels, psychological distress, and depression in 73, 131 individuals.  
35 *JAMA Psychiatry* 2013;**70**:176–84.  
36  
37  
38 32 Allin KH, Bojesen SE, Nordestgaard BG. Baseline C-reactive protein is  
39 associated with incident cancer and survival in patients with cancer. *J Clin*  
40 *Oncol* 2009;**27**:2217–24.  
41  
42 33 Kaptoge S, Di Angelantonio E, Lowe G, *et al.* C-reactive protein concentration  
43 and risk of coronary heart disease, stroke, and mortality: an individual  
44 participant meta-analysis. *Lancet* 2010;**375**:132–40.  
45  
46 34 Meier-Ewert HK, Ridker PM, Rifai N, *et al.* Absence of diurnal variation of C-  
47 reactive protein concentrations in healthy human subjects. *Clin Chem*  
48 2001;**47**:426–30.  
49  
50  
51 35 Campos H, Siles X. Siesta and the risk of coronary heart disease: results from a  
52 population-based, case-control study in Costa Rica. *Int J Epidemiol*  
53 2000;**29**:429–37.  
54  
55  
56 36 Lam K-BH, Jiang CQ, Thomas GN, *et al.* Napping is associated with increased  
57 risk of type 2 diabetes: the Guangzhou Biobank Cohort Study. *Sleep*  
58 2010;**33**:402–7.  
59  
60



- 1  
2  
3 37 Naska A, Oikonomou E, Trichopoulou A, *et al.* Siesta in healthy adults and  
4 coronary mortality in the general population. *Arch Intern Med* 2007;**167**:296–  
5 301.  
6  
7 38 Gao J, Huang X, Park Y, *et al.* Daytime napping, nighttime sleeping, and  
8 Parkinson disease. *Am J Epidemiol* 2011;**173**:1032–8.  
9  
10 39 Foley D, Monjan A, Masaki K, *et al.* Daytime sleepiness is associated with 3-  
11 year incident dementia and cognitive decline in older Japanese-American men.  
12 *J Am Geriatr Soc* 2001;**49**:1628–32.  
13  
14 40 Chen H, O'Reilly EJ, Schwarzschild M a, *et al.* Peripheral inflammatory  
15 biomarkers and risk of Parkinson's disease. *Am J Epidemiol* 2008;**167**:90–5.  
16  
17 41 Ferrie JE, Kivimäki M, Akbaraly TN, *et al.* Associations Between Change in  
18 Sleep Duration and Inflammation: Findings on C-reactive Protein and  
19 Interleukin 6 in the Whitehall II Study. *Am J Epidemiol* 2013;**178**:956–61.  
20  
21 42 Mullington JM, Haack M, Toth M, *et al.* Cardiovascular, inflammatory, and  
22 metabolic consequences of sleep deprivation. *Prog Cardiovasc Dis*  
23 2009;**51**:294–302.  
24  
25 43 Chiu J-J, Usami S, Chien S. Vascular endothelial responses to altered shear  
26 stress: pathologic implications for atherosclerosis. *Ann Med* 2009;**41**:19–28.  
27  
28 44 Liukkonen T, Räsänen P, Ruokonen A, *et al.* C-reactive protein levels and  
29 sleep disturbances: observations based on the Northern Finland 1966 Birth  
30 Cohort study. *Psychosom Med* 2007;**69**:756–61.  
31  
32 45 Svensson M, Venge P, Janson C, *et al.* Relationship between sleep-disordered  
33 breathing and markers of systemic inflammation in women from the general  
34 population. *J Sleep Res* 2012;**21**:147–54.  
35  
36  
37  
38  
39  
40  
41  
42  
43  
44  
45  
46  
47  
48  
49  
50  
51  
52  
53  
54  
55  
56  
57  
58  
59  
60

1  
2  
3  
4  
5  
6  
7  
8  
9  
10  
11  
12  
13  
14  
15  
16  
17  
18  
19  
20  
21  
22  
23  
24  
25  
26  
27  
28  
29  
30  
31  
32  
33  
34  
35  
36  
37  
38  
39  
40  
41  
42  
43  
44  
45  
46  
47  
48  
49  
50  
51  
52  
53  
54  
55  
56  
57  
58  
59  
60

For peer review only

## Daytime napping, sleep duration and serum C-reactive protein: a population-based cohort study

Yue Leng, M,Phil<sup>1\*</sup>, Sara Ahmadi-Abhari, MD<sup>1</sup>, Nick W.J. Wainwright, PhD<sup>1</sup>, Francesco P. Cappuccio, FRCP, FAHA<sup>2</sup>, Paul G. Surtees, PhD<sup>1</sup>, Robert Luben, MSc<sup>1</sup>, Carol Brayne, MD, FRCP<sup>3</sup>, Kay-Tee Khaw, MD, FRCP<sup>1</sup>

### Affiliations

<sup>1</sup> Department of Public Health and Primary Care, Strangeways Research Laboratory, University of Cambridge, Cambridge, UK

<sup>2</sup> Division of Mental Health & Wellbeing, Warwick Medical School, University of Warwick, Coventry, UK

<sup>3</sup> Department of Public Health and Primary Care, Institute of Public Health, University of Cambridge, Cambridge, UK

Word count: 3195 (Main text, excluding title page, abstract, references, figures and tables);

---

\* Address for correspondence: Yue Leng, Department of Public Health and Primary Care, Strangeways Research Laboratory, University of Cambridge, Cambridge CB1 8RN, UK (Email: [yl411@medschl.cam.ac.uk](mailto:yl411@medschl.cam.ac.uk); Tel: +44(0)1223748686)

## ABSTRACT

**Objectives:** To explore whether daytime napping and sleep duration are linked to serum C-reactive protein (CRP), a pro-inflammatory marker, in an older-aged British population.

**Design:** ~~Cross-sectional Population-based prospective cohort~~ study

**Setting:** European Prospective Investigation into Cancer and Nutrition (EPIC)-Norfolk study.

**Participants:** A total of 5018 men and women aged 48-92 years reported their sleep habits and had serum CRP levels measured.

**Outcome and measures:** CRP was measured (mg/l) during 2006-2011 in fresh blood samples using high-sensitivity methods. Participants reported napping habits during 2002-2004, and reported sleep quantity during 2006-2007. Multivariable linear regression models were used to examine the association between napping and log-transformed CRP, and geometric mean CRP levels were calculated.

**Results:** After adjustment for age and sex, those who reported napping had 10% higher CRP levels compared to those not napping. The association was attenuated but remained borderline significant [ $\beta= 0.05$  (95% CI: 0.00, 0.10)] after further adjustment for social class, education, marital status, body mass index, physical activity, smoking, alcohol intake, self-reported health, pre-existing diseases, systolic blood pressure, hypnotic drug use, depression and in women only hormone replacement therapy use. The geometric means (95%CI) of CRP levels were 2.38 (2.29-2.47) mg/l and 2.26 (2.21-2.32) mg/l for those who reported napping and no

1  
2  
3 napping, respectively. A U-shaped association was observed between time spent in  
4 bed at night and CRP levels, and night time sleep duration was not associated with  
5 serum CRP levels. The association between napping and CRP was stronger for older  
6 participants, and amongst extremes of time spent in bed at night.  
7  
8  
9  
10

11  
12 **Conclusions:** Daytime napping was associated with increased CRP levels in an older-  
13 aged British population. Further studies are needed to determine whether daytime  
14 napping is a cause for systemic inflammation, or if it is a symptom or consequence of  
15 underlying health problems.  
16  
17  
18  
19  
20

21  
22 **Keywords:** *Sleep; Napping; C-reactive protein; Inflammation; Population*  
23  
24  
25  
26  
27  
28  
29  
30  
31  
32  
33  
34  
35  
36  
37  
38  
39  
40  
41  
42  
43  
44  
45  
46  
47  
48  
49  
50  
51  
52  
53  
54  
55  
56  
57  
58  
59  
60

## Article summary

### Article focus:

- Daytime napping has been associated with cardiovascular disease and mortality, but the biological implication of napping is unclear.
- To our knowledge, this is the first population-based study to examine the association between daytime napping and serum CRP levels.
- We also studied both time spent in bed at night and sleep duration in relation to CRP levels.

### Key messages:

- Daytime napping was associated with 10% higher CRP levels, independent of age and sex.
- The association was more pronounced in women, older participants, and amongst extremes of time spent in bed at night.
- Sleep duration was not associated with CRP levels.

### Strengths and limitations:

- Our study benefits from a large population-based sample, measures of both daytime and night time sleep, and a wide range of covariates available for adjustment.
- Sleep habits were self-reported
- The purpose and duration of napping was not reported, and sleep apnea was not measured.

## Introduction

1  
2  
3  
4  
5  
6 Recently there has been growing interest in studying the health implications of  
7  
8 daytime napping. Although the benefits of napping on wakefulness performance have  
9  
10 been widely documented, especially among shift workers,<sup>1</sup> a few studies also  
11  
12 reported an increased health risk associated with daytime napping. Specifically,  
13  
14 daytime napping has been associated with increased mortality,<sup>2,3</sup> cardiovascular,  
15  
16 <sup>4</sup>and diabetes risk.<sup>5</sup> We have recently found a 32% increased mortality risk among  
17  
18 those who napped for  $\geq 1$ h/ day in a middle- to older- aged English population.<sup>6</sup>  
19  
20 While it is not yet clear whether daytime napping is a cause or symptom of the  
21  
22 increased health risk, examination of the physiological correlations of napping will  
23  
24 help to gain understanding of the napping-health relationship.  
25  
26  
27  
28

29  
30 One important proposed pathway for the association between sleep and health  
31  
32 outcomes is through inflammation.<sup>7</sup> C-reactive protein (CRP), a general marker for  
33  
34 inflammation, was first suggested to increase after sleep deprivation in an  
35  
36 experimental study.<sup>8</sup> Since then, there have been increasing numbers of observational  
37  
38 studies which produced mixed findings on the association. Long sleep duration has  
39  
40 been associated with increasing CRP among men,<sup>9</sup> women,<sup>10</sup> as well as in the sexes  
41  
42 combined sample,<sup>11,12</sup> with long sleep being brought up as a potential marker of  
43  
44 underlying inflammatory illness.<sup>11</sup> By contrast, Miller et al<sup>13</sup> found an association  
45  
46 between short sleep duration and increased CRP only in women. Taheri et al  
47  
48 suggested no significant association between CRP levels and sleep duration in the  
49  
50 Wisconsin Sleep Cohort Study.<sup>14</sup>  
51  
52  
53  
54

55  
56 Despite the growing interest into the inflammatory correlates of night time sleep, there  
57  
58 has been limited evidence on the physiological effects of daytime napping.  
59  
60

1  
2  
3 Experimental study has reported a beneficial effect of napping on immune cells  
4 following acute sleep restriction.<sup>15</sup> However, habitual daytime napping as a lifestyle  
5 might relate to different physiological effects compared to napping as a form of  
6 recovery sleep, and understanding the link between habitual napping and  
7 inflammation could help to clarify the association observed for napping and the  
8 increased mortality risk. Moreover, a number of changes in sleep from middle to older  
9 adulthood have been reported, including an advanced circadian pacemaker, decreased  
10 sleep efficiency and increased daytime sleepiness.<sup>16,17,18</sup> Therefore we set out to  
11 examine the associations between daytime napping and serum CRP levels in the  
12 European Prospective Investigation into Cancer (EPIC)-Norfolk cohort study, a  
13 middle- to older- aged British population. In addition, we have previously reported  
14 the different implications between sleep duration and time spent in bed,<sup>19</sup> so  
15 confirmatory analysis was also conducted to test the associations separately for sleep  
16 duration and time spent in bed at night. Given the gender disparity suggested by some  
17 previous studies,<sup>14, 18</sup> we explored sex differences in the associations.

## 37 **Methods**

### 41 **Participants**

42 The design and study methods of EPIC-Norfolk have been described  
43 previously.<sup>21</sup> Briefly, 25,639 men and women were recruited into the EPIC-Norfolk  
44 study during 1993-1997 using general practice age-sex registers, and attended the  
45 baseline health check. These participants were then followed up for two further health  
46 examinations from 1996 to 2000 and from 2006 to 2011. In between these health  
47 examinations, participants were sent questionnaires for completion and returned by  
48  
49  
50  
51  
52  
53  
54  
55  
56  
57  
58  
59  
60



1  
2  
3 post. The Norwich District Ethics Committee approved the study and all participants  
4  
5 gave signed informed consent.  
6  
7

### 8 9 **Sleep Measures**

10  
11 Habitual daytime napping was ascertained during 2002-2004, by asking participants  
12  
13 the question “Do you normally take a nap during the day?”.  
14

15  
16  
17 “Night time sleep duration” and “Time spent in bed at night” were ascertained during  
18  
19 2006-2007, by asking participants “On average, about how many hours have you slept  
20  
21 each night?”; “At what time do you normally get up?” and “At what time do you  
22  
23 normally go to bed?”. “Time spent in bed” was derived from the differences between  
24  
25 rise time and bedtime, and as a weighted mean measure of weekday and weekend  
26  
27 times  $[5/7*(\text{time on a week- day})+ 2/7*(\text{time on a weekend day})]$ .  
28  
29  
30

### 31 32 **CRP**

33  
34  
35 CRP was measured (mg/l) at the third health examination (2006-2011) in fresh blood  
36  
37 samples using high-sensitivity methods using the Siemens Dimension clinical  
38  
39 chemistry analyzer (Siemens Dimension clinical chemistry analyzer, Newark,  
40  
41 Delaware, US), with between batch CV values of 3.1% at 7.86 mg/l, 3.7% at 88.75  
42  
43 mg/l.  
44  
45  
46

### 47 48 **Covariates**

49  
50  
51 Covariates measured closer in time to each measure of sleep were chosen and  
52  
53 included in the models for the corresponding sleep measures. The covariates were  
54  
55 chosen as a priori based on their link with CRP and sleep.<sup>19,22</sup> Social class  
56  
57 (professionals, managerial and technical occupations, skilled workers subdivided into  
58  
59  
60

1  
2  
3 non-manual and manual, partly skilled workers and unskilled manual workers) and  
4  
5 education (highest qualification attained: no qualifications, educated to age 16,  
6  
7 educated to age 18, and educated to degree level) were assessed at the baseline  
8  
9 questionnaire. Body Mass Index (BMI; weight in kilograms divided by height in  
10  
11 meters squared) and Systolic Blood Pressure (SBP) (mmHg) were objectively  
12  
13 assessed through the health examination. The other covariates reported by  
14  
15 questionnaires included: marital status (single, married, widowed, separated and  
16  
17 divorced), physical activity (inactive, moderately inactive, moderately active and  
18  
19 active<sup>23</sup>), smoking status (current, former and non-smokers), alcohol intake (units of  
20  
21 alcohol drunk per week), self-reported general health (excellent, good, moderate or  
22  
23 poor), Major Depressive Disorder (MDD) (Yes/No), pre-existing diseases (including  
24  
25 self-reported stroke, myocardial infarction, diabetes, cancer, asthma, bronchitis, and  
26  
27 emphysema), use of hypnotic drugs (Yes/No), and Hormone Replacement Therapy  
28  
29 (HRT) use.  
30  
31  
32  
33  
34

### 35 **Statistical analysis**

36  
37  
38 Analysis was restricted to those participants with complete data on all covariates. A  
39  
40 total of 5018 participants had complete data on CRP and at least one of the sleep  
41  
42 measures and were included in the analysis.  
43  
44

45  
46 The CRP values were natural-log transformed ( $\log_e$  CRP) to approximate a normal  
47  
48 distribution. Due to the U-shaped relationship reported by previous studies on sleep  
49  
50 duration and health risk,<sup>22,23</sup> and in order to retain sufficient numbers, sleep duration  
51  
52 was categorized into three categories (<6, 6-8, and >8 hours) and time spent in bed  
53  
54 was categorized into four categories (<6, 6-8, 8-10, and >10 hours). Multivariable  
55  
56 linear regression models using  $\log_e$  CRP as the outcome were conducted to examine  
57  
58  
59  
60

1  
2  
3 the associations between each sleep measure (daytime napping [N=4712], time spent  
4 in bed [N=4476] and sleep duration [N=4795]) and CRP levels. For each sleep  
5 variable, results were presented: A. adjusted for age, sex; B. further adjusted for social  
6 class, education and marital status, BMI, physical activity, smoking and alcohol  
7 intake, depression, self-reported health, pre-existing diseases, SBP, hypnotic drug use  
8 and in women only postmenopausal HRT. The sleep measures were mutually adjusted  
9 in model B. Since the associations for sleep duration and time in bed might be non-  
10 linear (approximately U-shaped), the  $\beta$  coefficients (with 95% confidence intervals)  
11 were calculated with 6-8h being the reference groups for the examination of sleep  
12 quantitative measures. For analysis by napping habit, the no napping category was  
13 chosen as reference group. Results were presented for the whole sample and for men  
14 and women separately.  
15  
16  
17  
18  
19  
20  
21  
22  
23  
24  
25  
26  
27  
28  
29

30 Geometric-mean (95% confidence interval, CI) serum CRP values (mg/l) were  
31 calculated by exponentiating crude and adjusted-least square mean (95% CI)  $\log_e$  CRP  
32 values. Finally, subgroup analysis was conducted for the main sleep variable of  
33 interest, napping and time spent in bed at night, to explore the effects of potential  
34 effect modifiers (including age, sex, social class, smoking, BMI, physical activity and  
35 pre-existing diseases). These analyses were adjusted for age, sex, social class,  
36 education, marital status and BMI. The two by two interactions between napping  
37 habit, time in bed, and sleep duration were examined using the likelihood ratio test.  
38  
39 Sensitivity analysis All statistical tests were two-sided, and a p value <0.05 was  
40 considered statistically significant. Analyses were implemented in STATA 12.0.  
41  
42  
43  
44  
45  
46  
47  
48  
49  
50  
51  
52  
53  
54  
55  
56  
57  
58  
59  
60

## Results

Characteristics of the study sample (2267 men, 2751 women) are shown in table 1. The mean age of the participants was 69.5 (ranging from 48 to 92) years old. More than 60% of the sample came from non-manual social class, and 48.0% were former or current smokers. A total of 38.5% men and 23.1% women reported daytime napping. The average time people spent in bed every night was  $8.6 \pm 0.8$  h and the average sleep duration was  $6.9 \pm 1.1$  h. Serum CRP ranged from 0.1-116.6 mg/l, with a median of 2.0 mg/l (interquartile range 2.07 mg/l).

Table 1 Baseline characteristics of the EPIC-Norfolk participants

|                                     | Men            | Women         | Total          |
|-------------------------------------|----------------|---------------|----------------|
| <b>Age (years) †</b>                | 70.5 (8.0)     | 68.6 (7.9)    | 69.5 (8.0)     |
| <b>Social class</b>                 |                |               |                |
| Non-manual                          | 1495 (66.5%)   | 1885 (69.3%)  | 3380 (68.0%)   |
| Manual                              | 753 (33.5%)    | 836 (30.7%)   | 1589 (32.0%)   |
| <b>Education</b>                    |                |               |                |
| Lower                               | 686 (30.3%)    | 1148 (41.7%)  | 1834 (36.6%)   |
| Higher                              | 1580 (69.7%)   | 1602 (58.3%)  | 3182 (63.4%)   |
| <b>Marital status</b>               |                |               |                |
| Single                              | 60 (2.8%)      | 99 (3.8%)     | 159 (3.3%)     |
| Married                             | 1929 (90.4%)   | 2017 (77.6%)  | 3946 (83.4%)   |
| Others                              | 144 (6.8%)     | 484 (18.6%)   | 628 (13.3%)    |
| <b>Smoking</b>                      |                |               |                |
| Current smoker                      | 147 (6.5%)     | 194 (7.1%)    | 341 (6.8%)     |
| Former smoker                       | 1178 (52.1%)   | 881 (32.1%)   | 2059 (41.2%)   |
| Never smoked                        | 936 (41.4%)    | 1666 (60.8%)  | 2602 (52.0%)   |
| <b>Physical activity</b>            |                |               |                |
| Inactive                            | 624 (29.0%)    | 677 (25.9%)   | 1301 (27.4%)   |
| Moderately inactive                 | 534 (24.9%)    | 877 (33.6%)   | 1411 (29.6%)   |
| Moderately active                   | 497 (23.1%)    | 613 (23.5%)   | 1110 (23.3%)   |
| Active                              | 493 (23.0%)    | 447 (17.1%)   | 940 (19.7%)    |
| <b>BMI (kg/m<sup>2</sup>) †</b>     | 26.7 (3.1)     | 26.0 (4.0)    | 26.3 (3.6)     |
| <b>SBP (mmHg) †</b>                 | 134.9 (16.9)   | 129.9 (17.3)  | 132.2 (17.3)   |
| <b>Alcohol (units)*</b>             | 8.0 (3.0-15.0) | 3.0 (1.5-8.0) | 5.0 (2.0-11.0) |
| <b>Pre-existing diseases</b>        |                |               |                |
| No                                  | 2095 (97.5%)   | 2499 (98.9%)  | 4594 (98.2%)   |
| Yes                                 | 53 (2.5%)      | 29 (1.1%)     | 82 (1.8%)      |
| <b>Hypnotic use</b>                 |                |               |                |
| No                                  | 2236 (98.6%)   | 2717 (98.8%)  | 4953 (98.7%)   |
| Yes                                 | 31 (1.4%)      | 34 (1.2%)     | 65 (1.3%)      |
| <b>MDD in the last year</b>         |                |               |                |
| No                                  | 1964 (97.1%)   | 2336 (94.3%)  | 4300 (95.6%)   |
| Yes                                 | 58 (2.9%)      | 142 (5.7%)    | 200 (4.4%)     |
| <b>Self-reported general health</b> |                |               |                |
| Excellent                           | 443 (19.7%)    | 564 (20.6%)   | 1007 (20.2%)   |
| Good                                | 1549 (68.8%)   | 1828 (66.8%)  | 3377 (67.7%)   |
| Moderate                            | 245 (10.9%)    | 332 (12.1%)   | 577 (11.6%)    |
| Poor                                | 15 (0.7%)      | 11 (0.4%)     | 26 (0.5%)      |
| <b>Napping</b>                      |                |               |                |
| No                                  | 1309 (61.5%)   | 1986 (76.9%)  | 3295 (69.9%)   |
| Yes                                 | 819 (38.5%)    | 598 (23.1%)   | 1417 (30.1%)   |
| <b>Time in bed (h) †</b>            | 8.5 (0.9)      | 8.7 (0.8)     | 8.6 (0.8)      |
| <b>Sleep duration (h) †</b>         | 7.0 (1.1)      | 6.9 (1.1)     | 6.9 (1.1)      |
| <b>CRP (mg/l)*</b>                  | 1.9 (1.3-3.2)  | 2.0 (1.3-3.5) | 2.0 (1.3-3.4)  |

Results were presented as † mean (SD), \* median (IQR) and the rest N(%). BMI: Body Mass Index; SBP: Systolic Blood Pressure; MDD: Major Depressive Disorder; CRP: C-reactive protein.

1  
2  
3 The unadjusted geometric means of CRP were 2.53 (2.44-2.63) mg/l and 2.20 (2.15-  
4 2.26) mg/l for those who reported napping and no napping, respectively. Table 2  
5 shows differences in  $\log_e$  CRP according to report of napping. After adjustment for  
6 age and sex, daytime napping was associated with 10% higher CRP levels [ $\beta$ = 0.10,  
7 95%CI (0.05, 0.15),  $p$ <0.001]. With further adjustment for socio-economic status,  
8 health-related behaviors, physical health and night time sleep, the association was  
9 attenuated but remained borderline significant [ $\beta$ = 0.05, 95%CI (0.00, 0.10),  
10  $p$ =0.048]. Table 3 shows the multivariable-adjusted geometric means of CRP. The  
11 geometric means of CRP levels were 2.38 (2.29-2.47) mg/l and 2.26 (2.21-2.32) mg/l  
12 for those who reported napping and no napping, respectively. When analyses were  
13 stratified by sex, the associations between the above napping measure and CRP levels  
14 were only significant among women.  
15  
16  
17  
18  
19  
20  
21  
22  
23  
24  
25  
26  
27  
28  
29

30 The unadjusted geometric means of CRP for those who reported spending <6, 6-8, 8-  
31 10 and >10 hours in bed at night were 3.70 (2.48-5.53), 2.25 (2.15-2.35), 2.29 (2.23-  
32 2.35) and 2.84 (2.52-3.19) mg/l, respectively. After adjustment for age and sex,  
33 spending <6h and >10h in bed were associated with 51% and 17% increase in CRP  
34 levels, respectively (table 2). After full adjustments, long time spent in bed was  
35 associated with 12% increase in CRP levels while the association between short time  
36 in bed and  $\log_e$  CRP was not significant. The geometric means of CRP levels among  
37 those who spent >10h and <6h in bed were 2.57 (2.30-2.87) and 3.00 (2.04-4.40)  
38 mg/l, respectively, higher than those who spent 6-8h in bed [2.28 (2.19-2.38) mg/l].  
39 Night time sleep duration was not associated with  $\log_e$  CRP. Repeating the analyses  
40 restricted to individuals with CRP levels below 10 mg/L did not change the results.  
41  
42  
43  
44  
45  
46  
47  
48  
49  
50  
51  
52  
53  
54  
55  
56  
57  
58  
59  
60

Table 2 Linear regression on sleep and log<sub>e</sub>CRP in the EPIC-Norfolk cohort study

|                              | All [ $\beta$ (95% CI)] |                   | Men [ $\beta$ (95% CI)] |                   | Women [ $\beta$ (95% CI)] |         |                                     |
|------------------------------|-------------------------|-------------------|-------------------------|-------------------|---------------------------|---------|-------------------------------------|
|                              | Model A                 | Model B           |                         | Model A           | Model B                   | Model A | Model B                             |
| <b>Napping (4712)</b>        |                         |                   | 2128                    |                   |                           | 2584    |                                     |
| No (n=3295)                  | Reference               |                   | 1309                    |                   |                           | 1986    |                                     |
| Yes (n=1417)                 | 0.10***[0.05,0.15]      | 0.05*[0.00,0.10]  | 819                     | 0.08*[0.01,0.15]  | 0.03[-0.03,0.10]          | 598     | 0.12***[0.06,0.19] 0.07*[0.00,0.13] |
| <b>Time in bed (4476)</b>    |                         |                   | 2036                    |                   |                           | 2440    |                                     |
| <6h (n=13)                   | 0.51*[0.11,0.91]        | 0.27[-0.11,0.66]  | 7                       | 0.26[-0.30,0.82]  | 0.18[-0.37,0.73]          | 6       | 0.79**[0.22,1.37] 0.43[-0.12,0.97]  |
| 6-8h (n=1101)                | Reference               |                   | 620                     | Reference         |                           | 481     | Reference                           |
| 8-10h (n=3208)               | -0.01[-0.06,0.04]       | 0[-0.05,0.05]     | 1342                    | -0.03[-0.10,0.04] | -0.01[-0.09,0.06]         | 1866    | 0[-0.07,0.07] 0.02[-0.05,0.09]      |
| >10h (n=154)                 | 0.17**[0.05,0.29]       | 0.12*[0.00,0.24]  | 67                      | 0.18[-0.02,0.37]  | 0.14[-0.05,0.33]          | 87      | 0.17*[0.00,0.33] 0.11[-0.05,0.26]   |
| P                            | 0.001                   | 0.09              |                         | 0.11              | 0.35                      |         | 0.01 0.23                           |
| <b>Sleep duration (4795)</b> |                         |                   | 2173                    |                   |                           | 2622    |                                     |
| <6h (n=1232)                 | 0[-0.04,0.05]           | -0.02[-0.07,0.02] | 476                     | -0.01[-0.09,0.06] | -0.05[-0.13,0.02]         | 756     | 0.02[-0.04,0.08] -0.01[-0.07,0.05]  |
| 6-8h (n=3154)                | Reference               |                   | 1483                    | Reference         |                           | 1671    | Reference                           |
| >8h (n=409)                  | 0.04[-0.03,0.12]        | 0[-0.07,0.08]     | 214                     | 0.08[-0.03,0.19]  | 0.02[-0.08,0.13]          | 195     | -0.01[-0.11,0.10] -0.01[-0.11,0.09] |
| p                            | 0.57                    | 0.59              |                         | 0.28              | 0.31                      |         | 0.86 0.95                           |

Model A: age, sex; Model B: age, sex, social class, education, marital status, BMI, physical activity, smoking, alcohol, self-reported health, pre-existing diseases, SBP, hypnotic use, major depressive disorder, and in women only HRT use. The sleep measures were mutually adjusted in model B. Results were presented as  $\beta$  coefficients (95%CI) of linear regression models using log<sub>e</sub>CRP as the outcome.

\*p<0.05 \*\* p<0.01 \*\*\*p<0.001

Table 3 Geometric means (95% CI) of CRP (mg/l) by sleep in the EPIC-Norfolk cohort study

|                              | All                  |                    | Men  |                    |                   | Women |                      |                    |
|------------------------------|----------------------|--------------------|------|--------------------|-------------------|-------|----------------------|--------------------|
|                              | Model A              | Model B            |      | Model A            | Model B           |       | Model A              | Model B            |
| <b>Napping (4712)</b>        |                      |                    | 2128 |                    |                   | 2584  |                      |                    |
| No (n=3295)                  | 2.23 [2.17, 2.28]*** | 2.26 [2.21, 2.32]* | 1309 | 2.18 [2.09, 2.27]* | 2.22 [2.13, 2.31] | 1986  | 2.27 [2.20, 2.35]*** | 2.30 [2.23, 2.37]* |
| Yes (n=1417)                 | 2.47 [2.37, 2.57]    | 2.38 [2.29, 2.47]  | 819  | 2.36 [2.24, 2.49]  | 2.29 [2.18, 2.41] | 598   | 2.57 [2.43, 2.73]    | 2.45 [2.31, 2.59]  |
| <b>Time in bed (4476)</b>    |                      |                    | 2036 |                    |                   | 2440  |                      |                    |
| <6h (n=13)                   | 3.82 [2.56, 5.69]*   | 3.00 [2.04, 4.40]  | 7    | 2.97 [1.70, 5.21]  | 2.73 [1.58, 4.72] | 6     | 5.09 [2.87, 9.01]**  | 3.46 [2.01, 5.93]  |
| 6-8h (n=1101)                | 2.30 [2.20, 2.40]    | 2.28 [2.18, 2.38]  | 620  | 2.29 [2.16, 2.43]  | 2.27 [2.14, 2.41] | 481   | 2.30 [2.16, 2.45]    | 2.28 [2.14, 2.42]  |
| 8-10h (n=3208)               | 2.27 [2.21, 2.33]    | 2.29 [2.23, 2.34]  | 1342 | 2.22 [2.14, 2.32]  | 2.24 [2.15, 2.33] | 1866  | 2.31 [2.23, 2.38]    | 2.32 [2.25, 2.39]  |
| >10h (n=154)                 | 2.73 [2.43, 3.06]**  | 2.57 [2.30, 2.87]* | 67   | 2.74 [2.28, 3.28]  | 2.61 [2.19, 3.11] | 87    | 2.72 [2.34, 3.17]*   | 2.50 [2.17, 2.89]  |
| <b>Sleep duration (4795)</b> |                      |                    | 2173 |                    |                   | 2622  |                      |                    |
| <6h (n=1232)                 | 2.28 [2.18, 2.37]    | 2.24 [2.15, 2.33]  | 476  | 2.19 [2.05, 2.35]  | 2.14 [2.00, 2.28] | 756   | 2.34 [2.23, 2.46]    | 2.30 [2.19, 2.41]  |
| 6-8h (n=3154)                | 2.27 [2.21, 2.33]    | 2.29 [2.24, 2.35]  | 1483 | 2.22 [2.14, 2.31]  | 2.26 [2.17, 2.34] | 1671  | 2.30 [2.23, 2.38]    | 2.32 [2.25, 2.40]  |
| >8h (n=409)                  | 2.36 [2.20, 2.53]    | 2.30 [2.15, 2.46]  | 214  | 2.41 [2.18, 2.66]  | 2.30 [2.09, 2.54] | 195   | 2.29 [2.07, 2.53]    | 2.29 [2.09, 2.52]  |

Model A: age, sex; Model B: age, sex, social class, education, marital status, BMI, physical activity, smoking, alcohol, self-reported health, pre-existing diseases, SBP, hypnotic use, major depressive disorder, and in women only HRT use. The sleep measures were mutually adjusted in model B. Results were presented as geometric means (95%CI) of CRP (mg/l).

\*p<0.05 \*\* p<0.01 \*\*\*p<0.001; p values were based on comparisons using no napping or 6-8h as the reference category.



Subgroup analysis investigated differences in these associations by age, sex, social class, smoking, BMI, physical activity and pre-existing diseases (Table 4). These data suggested that the association between napping and CRP levels was stronger for those who were older as compared to those who were younger (p for interaction = 0.007). In addition, the association was more pronounced for extremes of time spent in bed at night (p for interaction=0.01) (Figure 1).

Table 4 The association between log<sub>e</sub> CRP and napping or time spent in bed at night, by subgroups

|                              | Napping (Reference: No)        |              | Time spent in bed at night (reference: 6-8h) |              |       |              |        |              |
|------------------------------|--------------------------------|--------------|----------------------------------------------|--------------|-------|--------------|--------|--------------|
|                              | Yes                            | [β (95% CI)] | 0-6h                                         | [β (95% CI)] | 8-10h | [β (95% CI)] | >10h   | [β (95% CI)] |
| <b>Age</b>                   | <b>p for interaction=0.007</b> |              | <b>p for interaction=0.66</b>                |              |       |              |        |              |
| <70                          | 0                              | [-0.06,0.06] | 0.14                                         | [-0.25,0.52] | 0     | [-0.06,0.06] | 0.16*  | [0.01,0.32]  |
| >70                          | 0.09**                         | [0.02,0.15]  | 0.02                                         | [-0.59,0.63] | 0.03  | [-0.05,0.11] | 0.12   | [-0.04,0.28] |
| <b>Sex</b>                   | <b>p for interaction=0.87</b>  |              | <b>p for interaction=0.82</b>                |              |       |              |        |              |
| Men                          | 0.04                           | [-0.02,0.11] | 0.07                                         | [-0.40,0.53] | -0    | [-0.08,0.06] | 0.16   | [-0.03,0.35] |
| Women                        | 0.05                           | [-0.01,0.11] | 0.15                                         | [-0.33,0.62] | 0.02  | [-0.04,0.08] | 0.1    | [-0.04,0.23] |
| <b>Social class</b>          | <b>p for interaction=0.38</b>  |              | <b>p for interaction=0.31</b>                |              |       |              |        |              |
| Higher                       | 0.03                           | [-0.03,0.08] | 0.15                                         | [-0.27,0.57] | 0.01  | [-0.05,0.06] | 0.19** | [0.05,0.33]  |
| Lower                        | 0.07                           | [-0.01,0.14] | 0.08                                         | [-0.45,0.61] | 0     | [-0.08,0.09] | 0      | [-0.18,0.19] |
| <b>Smoking</b>               | <b>p for interaction=0.5</b>   |              | <b>p for interaction=0.55</b>                |              |       |              |        |              |
| Current or former smokers    | 0.01                           | [-0.05,0.08] | 0.12                                         | [-0.33,0.57] | -0    | [-0.10,0.05] | 0.12   | [-0.04,0.29] |
| Never smoked                 | 0.06*                          | [0.01,0.12]  | 0.11                                         | [-0.37,0.60] | 0.03  | [-0.03,0.09] | 0.11   | [-0.04,0.26] |
| <b>BMI</b>                   | <b>p for interaction=0.73</b>  |              | <b>p for interaction=0.30</b>                |              |       |              |        |              |
| Lower                        | 0.06                           | [-0.00,0.12] | -0.15                                        | [-0.76,0.46] | 0.04  | [-0.03,0.10] | 0.18*  | [0.02,0.34]  |
| Higher                       | 0.07*                          | [0.01,0.14]  | 0.36                                         | [-0.05,0.77] | -0    | [-0.10,0.04] | 0.09   | [-0.07,0.25] |
| <b>Physical activity</b>     | <b>p for interaction=0.48</b>  |              | <b>p for interaction=0.41</b>                |              |       |              |        |              |
| Inactive                     | 0.06*                          | [0.00,0.12]  | 0.28                                         | [-0.14,0.71] | 0.02  | [-0.04,0.08] | 0.13   | [-0.00,0.26] |
| Active                       | 0.02                           | [-0.05,0.09] | -0.13                                        | [-0.65,0.38] | -0    | [-0.10,0.05] | 0.08   | [-0.14,0.29] |
| <b>Pre-existing diseases</b> | <b>p for interaction=0.05</b>  |              | <b>p for interaction=0.08</b>                |              |       |              |        |              |
| Yes                          | 0.05                           | [-0.25,0.35] | N/A                                          |              | 0.19  | [-0.19,0.56] | 0.81** | [0.21,1.41]  |
| No                           | 0.05*                          | [0.01,0.10]  | 0.11                                         | [-0.23,0.45] | 0.02  | [-0.03,0.07] | 0.08   | [-0.04,0.20] |

The model adjusted for age, sex, social class, education, marital status and BMI.

Results were presented as β coefficients of linear regression models using logCRP as the outcome.

\*p<0.05 \*\* p<0.01 \*\*\*p<0.001

## Discussion

Our findings from more than 4000 middle- to older-aged English adults suggest that daytime napping was independently associated with higher CRP levels. Those who reported napping had 10% higher CRP levels after adjustment for age and sex. The association was attenuated but remained statistically significant after adjustment for all the covariates. A U-shaped association was observed between time spent in bed at night and CRP levels, though only the effect of long time spent in bed was statistically significant. The napping-CRP associations were more pronounced amongst extremes of time spent in bed at night. No association was found between sleep duration and CRP levels.

To our knowledge, this is the first study to report an association between habitual daytime napping and inflammation. This gives biological insights to the health impact of daytime napping proposed by previous studies.<sup>4, 24</sup> Our study benefits from a large population-based sample, and a wide range of covariates available for adjustment.

Although only moderate effect size was detected in the multivariable model, the possibility of over adjustment can not be excluded, given the complexity of the relationship between sleep and health. Overall, -this preliminary finding at population level provides an interesting perspective and implies the need for further physiological studies. There are several limitations. Similar to most previous population studies,<sup>24, 25</sup> daytime napping was self-reported as yes or no. It was suggested that power naps ( naps< 30min) can be largely beneficial,<sup>2,26</sup> while naps>30min can cause sleep inertia and are not recommended.<sup>29</sup> Without detailed report of napping duration, we were unable to differentiate the effects of power naps from excessive napping. Other sleep disorders (e.g. sleep apnea) that might have led

1  
2  
3 to daytime sleepiness were not assessed, so the possibility of residual confounding by  
4 these sleep disorders can not be ruled out. Moreover, reported sleep may be a marker  
5 of distress levels,<sup>30</sup> which has been linked with CRP levels.<sup>31</sup> However, evaluation of  
6 sleep in the primary care setting relies on self-reported data from patients, and also the  
7 association remained after adjustment for MDD. Another limitation of this study is  
8 that associations are based on a single measurement of CRP. However, the intra-  
9 individual variability of CRP measurements is similar to that of other physiologic  
10 measures such as blood pressure and cholesterol levels, and a single measurement of  
11 CRP has been shown to predict a range of health outcomes.<sup>30,31</sup> Besides, previous  
12 study has reported no diurnal variation of CRP concentrations.<sup>34</sup> Notably, while the  
13 assessment of napping preceded the CRP measures, baseline CRP level was not  
14 measured and there is no information on changes in CRP over time. We were  
15 therefore unable to distinguish between napping as a risk factor for, or as an early  
16 marker of, increased inflammatory levels. Finally, the current analysis was restricted  
17 to the 5018 participants with complete data on CRP and at least one of the sleep  
18 measures. Compared to the other participants from the baseline cohort (N=25,639),  
19 the present sample were 4 years younger, more likely to be of higher social class and  
20 higher education levels. Therefore, our findings have limited generalizability to  
21 populations with lower socioeconomic status.  
22  
23  
24  
25  
26  
27  
28  
29  
30  
31  
32  
33  
34  
35  
36  
37  
38  
39  
40  
41  
42  
43  
44  
45

46 The present study suggested that daytime napping and long time spent in bed at night  
47 were associated with higher CRP levels. The observed effect size was similar to  
48 previous report on sleep duration and CRP levels,<sup>10</sup> and the increase in CRP levels  
49 associated with napping was similar to that associated with 5-year increase in age.<sup>22</sup>  
50  
51 While there are no other studies with which to directly compare our findings, the  
52 current study is in line with existing evidence on the increased cardiovascular,  
53  
54  
55  
56  
57  
58  
59  
60

1  
2  
3 metabolic and mortality risks among those who take naps, found both by other studies  
4 and in our study population.<sup>6,7,33,34</sup> Meanwhile, a Greek cohort study suggested that  
5 siesta might help to reduce coronary mortality through a stress-releasing mechanism  
6 in healthy working men.<sup>37</sup> We also found the association between daytime napping  
7 and increased CRP levels only significant among participants over 70 years old when  
8 analysis was stratified by age. Daytime napping might have different implications for  
9 health among different age groups, and this needs to be considered by future studies.

10  
11  
12  
13  
14  
15  
16  
17  
18 Notably, daytime napping or daytime sleepiness has been associated with the  
19 occurrence of degenerative diseases such as Parkinson's disease and dementia in the  
20 older population.<sup>38 39</sup> It has also been reported that chronic inflammation, as indicated  
21 by an elevation in plasma interleukin (IL)-6 levels, was predictive of future  
22 Parkinson's disease.<sup>40</sup> In the current study, daytime napping was associated with a  
23 higher serum CRP level, while information on other inflammatory biomarkers was not  
24 obtained. Future studies with more complete measures of chronic inflammation might  
25 help to clarify the link between daytime napping and degenerative diseases in the  
26 elderly. Several studies suggested that the association between sleep and  
27 inflammation was only observed in women.<sup>14,18</sup> Consistent with these findings, the  
28 association between napping and increased CRP levels was only significant in  
29 women, although test for interaction was not statistically significant. The reason for  
30 this is unclear, and the gender disparities of sleep physiology need further exploration.

31  
32  
33  
34  
35  
36  
37  
38  
39  
40  
41  
42  
43  
44  
45  
46  
47  
48  
49  
50  
51  
52  
53  
54  
55  
56  
57  
58  
59  
60  
Time spent in bed was rarely studied in relation to CRP concentrations, but long sleep  
duration has been associated with increased CRP levels.<sup>10,12</sup> Since epidemiology  
studies have used mixed ways to define sleep duration, the associations between long  
sleep and inflammation found by some previous studies might actually reflect the  
effects of long time spent in bed, which was associated with poor general health.<sup>19</sup>

1  
2  
3  
4  
5  
6  
7  
8  
9  
10  
11  
12  
13  
14  
15  
16  
17  
18  
19  
20  
21  
22  
23  
24  
25  
26  
27  
28  
29  
30  
31  
32  
33  
34  
35  
36  
37  
38  
39  
40  
41  
42  
43  
44  
45  
46  
47  
48  
49  
50  
51  
52  
53  
54  
55  
56  
57  
58  
59  
60

Indeed, long time spent in bed has been associated with poorer general health, pre-existing health problems, and more frequent use of sleep medications in the EPIC-Norfolk cohort.<sup>19</sup> Therefore, the observed association between long time spent in bed and increased CRP levels might be explained by declining health status. We found no association between sleep duration and CRP levels. This is consistent with findings from the Wisconsin Sleep Cohort Study, which showed no association between CRP and sleep duration, measured both objectively and subjectively.<sup>14</sup> Meanwhile, previous studies have found both short and long sleep duration to be associated with increased CRP levels.<sup>13, 14</sup> Recently, a longitudinal study suggested that each hour per night decrease in sleep duration was associated with 8.1% higher average levels of CRP over a 5-year period.<sup>41</sup> The different correlations with serum CRP levels between the two sleep quantity measures need to be considered by future studies. Interestingly, the association between napping and CRP levels was more pronounced amongst extremes of time in bed. It is possible that extremes of time spent in bed at night partly reflected disturbed night-time sleep, and thereby added to the association for daytime napping. While the complex inter-relationship between night time and daytime sleep is yet to be confirmed, the present study suggested a need for a thorough consideration of both night time and daytime sleep in future studies.

It has been suggested that sleep deprivation is related to the activation of the autonomic nervous system and increased catecholamines, and subsequently stimulate the release of inflammatory mediators.<sup>42</sup> It is unclear biologically why daytime napping was associated with increased levels of inflammatory markers. One possible explanation is through a rise in blood pressure or heart rate upon awakening from a nap, which might be followed by increased endothelial shear stress and the production of inflammatory mediators.<sup>43</sup> Alternatively, daytime napping could be the

1  
2  
3 consequence of unnoticed night time sleep disturbance (e.g. sleep apnea) or sleep  
4 deprivation, which have been linked with systemic inflammation.<sup>42,44,45</sup> Sleep apnea  
5  
6  
7 was not measured in the current study, but the association between daytime napping  
8  
9 and serum CRP levels remained after adjustment for BMI and SBP, two strong  
10  
11 correlates of sleep apnea.  
12  
13

14  
15 In the United Kingdom, daytime napping is not part of the cultural norm. It is  
16  
17 plausible that those who reported daytime napping and long time spent in bed may  
18  
19 represent a population with underlying ill health, and inflammation could be an early  
20  
21 sign of these health problems. Although the association between daytime napping and  
22  
23 CRP concentrations remained after adjustment for pre-existing diseases, we did find it  
24  
25 more pronounced among the older participants, and there might be more existing  
26  
27 health problems among this population. Further studies are needed to determine  
28  
29 whether daytime napping is a cause for systemic inflammation, or if it is a symptom  
30  
31 or consequence of disturbed sleep at night or underlying health problems.  
32  
33  
34  
35

## 36 **Conclusions**

37  
38  
39 In summary, we found for the first time that daytime napping was associated with  
40  
41 increased CRP levels in a population-based middle- to older aged English cohort. The  
42  
43 association between daytime napping and CRP levels was more pronounced among  
44  
45 older people, and among those who spent extremes of time in bed at night. While the  
46  
47 present study provides new insights into the biological effects of daytime napping,  
48  
49 causality can not be established from an observational study. Daytime napping might  
50  
51 be useful as an independent indicator of people who are at underlying health risk or  
52  
53  
54  
55  
56  
57  
58  
59  
60

1  
2  
3 who suffer from disturbed sleep at night. Future physiological studies are needed to  
4  
5 gain better understanding of the association.  
6  
7  
8  
9  
10

## 11 **Acknowledgement**

12  
13  
14  
15  
16 We thank all study participants, general practitioners and the EPIC-Norfolk study  
17  
18 team for their contribution.  
19

## 20 **Competing interests**

21  
22  
23  
24  
25 None  
26  
27

28 **Funding statement:** The design and conduct of the EPIC-Norfolk study and  
29  
30 collection and management of the data was supported by programme grants from the  
31  
32 Medical Research Council UK (G9502233, G0300128) and Cancer Research UK  
33  
34 (C865/A2883). YL is supported by the Cambridge Overseas Trust. FPC leads the  
35  
36 Sleep Health & Society Programme at the University of Warwick supported, in part,  
37  
38 by the University of Warwick RDF and IAS. It has received funding by the NHS  
39  
40 National Workforce Projects and the Economic & Social Research Council  
41  
42 (ES/K002910/1).  
43  
44  
45  
46

## 47 **Authors' contributions**

48  
49  
50 The work presented here was carried out in collaboration between all authors. YL and  
51  
52 SA analyzed these data and wrote the manuscript with co-authors. YL, SA, NWJW,  
53  
54 FPC, PGS, CB and KTK discussed the analysis, interpretation and presentation of  
55  
56 these data. RL performed all data management and record linkage. RL and KTK are  
57  
58  
59  
60

1  
2  
3 on the management team of EPIC-Norfolk population study and contributed  
4 substantially to acquisition of data. KTK is a principal investigator in the EPIC-  
5 Norfolk study. All authors provided detailed comments on the draft, and revised the  
6 manuscript critically. All authors read and approved the final manuscript.  
7  
8  
9  
10  
11

## 12 13 14 15 16 17 18 19 20 21 22 23 24 25 26 27 28 29 30 31 32 33 34 35 36 37 38 39 40 41 42 43 44 45 46 47 48 49 50 51 52 53 54 55 56 57 58 59 60

### References

- 1 Milner C, Cote KA. Benefits of napping in healthy adults: impact of nap length, time of day, age, and experience with napping. *J Sleep Res* 2009;**18**:272–81.
- 2 Bursztyn M, Stessman J. The siesta and mortality: twelve years of prospective observations in 70-year-olds. *Sleep* 2005;**28**:345–7.
- 3 Jung K-I, Song C-H, Ancoli-Israel S, *et al.* Gender differences in nighttime sleep and daytime napping as predictors of mortality in older adults: the Rancho Bernardo study. *Sleep Med* 2013;**14**:12–9.
- 4 Tanabe N, Iso H, Seki N, *et al.* Daytime napping and mortality, with a special reference to cardiovascular disease: the JACC study. *Int J Epidemiol* 2010;**39**:233–43.
- 5 Xu Q, Song Y, Hollenbeck A, *et al.* Day napping and short night sleeping are associated with higher risk of diabetes in older adults. *Diabetes Care* 2010;**33**:78–83.
- 6 Leng Y, Wainwright NWJ, Cappuccio FP, *et al.* Daytime Napping and the Risk of All-Cause and Cause-Specific Mortality: A 13-Year Follow-up of a British Population. *Am J Epidemiol* 2014;**179**:1115–24.
- 7 Mullington JM, Simpson NS, Meier-Ewert HK, *et al.* Sleep loss and inflammation. *Best Pract Res Clin Endocrinol Metab* 2010;**24**:775–84.
- 8 Meier-Ewert HK, Ridker PM, Rifai N, *et al.* Effect of sleep loss on C-reactive protein, an inflammatory marker of cardiovascular risk. *J Am Coll Cardiol* 2004;**43**:678–83.
- 9 Jackowska M, Kumari M, Steptoe A. Sleep and biomarkers in the English Longitudinal Study of Ageing: associations with C-reactive protein, fibrinogen, dehydroepiandrosterone sulfate and hemoglobin. *Psychoneuroendocrinology* 2013;**38**:1484–93.
- 10 Patel SR, Zhu X, Storfer-Isser A, *et al.* Sleep duration and biomarkers of inflammation. *Sleep* 2009;**32**:200–4.



- 1  
2  
3 11 Dowd JB, Goldman N, Weinstein M. Sleep duration, sleep quality, and  
4 biomarkers of inflammation in a Taiwanese population. *Ann Epidemiol*  
5 2011;**21**:799–806.  
6  
7  
8 12 Grandner MA, Buxton OM, Jackson N, *et al.* Extreme sleep durations and  
9 increased C-reactive protein: effects of sex and ethnorracial group. *Sleep*  
10 2013;**36**:769–779E.  
11  
12 13 Miller MA, Kandala N-B, Kivimaki M, *et al.* Gender differences in the cross-  
13 sectional relationships between sleep duration and markers of inflammation:  
14 Whitehall II study. *Sleep* 2009;**32**:857–64.  
15  
16 14 Taheri S, Austin D, Lin L, *et al.* Correlates of serum C-reactive protein (CRP)--  
17 no association with sleep duration or sleep disordered breathing. *Sleep*  
18 2007;**30**:991–6.  
19  
20 15 Faraut B, Boudjeltia KZ, Dyzma M, *et al.* Benefits of napping and an extended  
21 duration of recovery sleep on alertness and immune cells after acute sleep  
22 restriction. *Brain Behav Immun* 2011;**25**:16–24.  
23  
24 16 Dijk DJ, Duffy JF, Czeisler CA. Contribution of circadian physiology and sleep  
25 homeostasis to age-related changes in human sleep. *Chronobiol Int*  
26 2000;**17**:285–311.  
27  
28 17 Foley D, Vitiello M, Bliwise D, *et al.* Frequent napping is associated with  
29 excessive daytime sleepiness, depression, pain, and nocturia in older adults. *Am*  
30 *J Geriatr Psychiatry* 2007;**15**:344–50.  
31  
32 18 Ohayon MM, Carskadon M a, Guilleminault C, *et al.* Meta-analysis of  
33 quantitative sleep parameters from childhood to old age in healthy individuals:  
34 developing normative sleep values across the human lifespan. *Sleep*  
35 2004;**27**:1255–73.  
36  
37 19 Leng Y, Wainwright NWJ, Cappuccio FP, *et al.* Self-reported sleep patterns in  
38 a British population cohort. *Sleep Med* 2014;**15**:295–302.  
39  
40 20 Suarez EC. Self-reported symptoms of sleep disturbance and inflammation,  
41 coagulation, insulin resistance and psychosocial distress: evidence for gender  
42 disparity. *Brain Behav Immun* 2008;**22**:960–8.  
43  
44 21 Day N, Oakes SA, Luben R, *et al.* EPIC-Norfolk: study design and  
45 characteristics of the cohort. *Br J Cancer* 1999;**80**:95–103.  
46  
47 22 Ahmadi-Abhari S, Luben RN, Wareham NJ, *et al.* Distribution and  
48 determinants of C-reactive protein in the older adult population: European  
49 Prospective Investigation into Cancer-Norfolk study. *Eur J Clin Invest*  
50 2013;**43**:899–911.  
51  
52 23 Wareham NJ, Jakes RW, Rennie KL, *et al.* Validity and repeatability of a  
53 simple index derived from the short physical activity questionnaire used in the  
54  
55  
56  
57  
58  
59  
60

- 1  
2  
3 European Prospective Investigation into Cancer and Nutrition (EPIC) study.  
4 *Public Health Nutr* 2003;**6**:407–13.  
5  
6  
7 24 Heslop P, Smith GD, Metcalfe C, *et al.* Sleep duration and mortality: The  
8 effect of short or long sleep duration on cardiovascular and all-cause mortality  
9 in working men and women. *Sleep Med* 2002;**3**:305–14.  
10  
11 25 Hublin C, Partinen M, Koskenvuo M, *et al.* Sleep and mortality: a population-  
12 based 22-year follow-up study. *Sleep* 2007;**30**:1245–53.  
13  
14 26 Bursztyn M. The siesta in the elderly: risk factor for mortality? *Arch Intern*  
15 *Med* 1999;**159**:1582–6.  
16  
17 27 Cohen-Mansfield J, Perach R. Sleep duration, nap habits, and mortality in older  
18 persons. *Sleep* 2012;**35**:1003–9.  
19  
20  
21 28 Ruggiero JS, Redeker NS. Effects of Napping on Sleepiness and Sleep-Related  
22 Performance Deficits in Night-Shift Workers: A Systematic Review. *Biol Res*  
23 *Nurs* 2014;**16**:134–42.  
24  
25 29 Tassi P, Muzet A. Sleep inertia. *Sleep Med Rev* 2000;**4**:341–53.  
26  
27  
28 30 Lavie P. Self-reported sleep duration--what does it mean? *J Sleep Res*  
29 2009;**18**:385–6.  
30  
31 31 Wium-Andersen MK, Ørsted DD, Nielsen SF, *et al.* Elevated C-reactive  
32 protein levels, psychological distress, and depression in 73, 131 individuals.  
33 *JAMA Psychiatry* 2013;**70**:176–84.  
34  
35 32 Allin KH, Bojesen SE, Nordestgaard BG. Baseline C-reactive protein is  
36 associated with incident cancer and survival in patients with cancer. *J Clin*  
37 *Oncol* 2009;**27**:2217–24.  
38  
39 33 Kaptoge S, Di Angelantonio E, Lowe G, *et al.* C-reactive protein concentration  
40 and risk of coronary heart disease, stroke, and mortality: an individual  
41 participant meta-analysis. *Lancet* 2010;**375**:132–40.  
42  
43 34 Meier-Ewert HK, Ridker PM, Rifai N, *et al.* Absence of diurnal variation of C-  
44 reactive protein concentrations in healthy human subjects. *Clin Chem*  
45 2001;**47**:426–30.  
46  
47 35 Campos H, Siles X. Siesta and the risk of coronary heart disease: results from a  
48 population-based, case-control study in Costa Rica. *Int J Epidemiol*  
49 2000;**29**:429–37.  
50  
51 36 Lam K-BH, Jiang CQ, Thomas GN, *et al.* Napping is associated with increased  
52 risk of type 2 diabetes: the Guangzhou Biobank Cohort Study. *Sleep*  
53 2010;**33**:402–7.  
54  
55  
56  
57  
58  
59  
60

- 1  
2  
3 37 Naska A, Oikonomou E, Trichopoulou A, *et al.* Siesta in healthy adults and  
4 coronary mortality in the general population. *Arch Intern Med* 2007;**167**:296–  
5 301.  
6  
7 38 Gao J, Huang X, Park Y, *et al.* Daytime napping, nighttime sleeping, and  
8 Parkinson disease. *Am J Epidemiol* 2011;**173**:1032–8.  
9  
10 39 Foley D, Monjan A, Masaki K, *et al.* Daytime sleepiness is associated with 3-  
11 year incident dementia and cognitive decline in older Japanese-American men.  
12 *J Am Geriatr Soc* 2001;**49**:1628–32.  
13  
14 40 Chen H, O'Reilly EJ, Schwarzschild M a, *et al.* Peripheral inflammatory  
15 biomarkers and risk of Parkinson's disease. *Am J Epidemiol* 2008;**167**:90–5.  
16  
17 41 Ferrie JE, Kivimäki M, Akbaraly TN, *et al.* Associations Between Change in  
18 Sleep Duration and Inflammation: Findings on C-reactive Protein and  
19 Interleukin 6 in the Whitehall II Study. *Am J Epidemiol* 2013;**178**:956–61.  
20  
21 42 Mullington JM, Haack M, Toth M, *et al.* Cardiovascular, inflammatory, and  
22 metabolic consequences of sleep deprivation. *Prog Cardiovasc Dis*  
23 2009;**51**:294–302.  
24  
25 43 Chiu J-J, Usami S, Chien S. Vascular endothelial responses to altered shear  
26 stress: pathologic implications for atherosclerosis. *Ann Med* 2009;**41**:19–28.  
27  
28 44 Liukkonen T, Räsänen P, Ruokonen A, *et al.* C-reactive protein levels and  
29 sleep disturbances: observations based on the Northern Finland 1966 Birth  
30 Cohort study. *Psychosom Med* 2007;**69**:756–61.  
31  
32 45 Svensson M, Venge P, Janson C, *et al.* Relationship between sleep-disordered  
33 breathing and markers of systemic inflammation in women from the general  
34 population. *J Sleep Res* 2012;**21**:147–54.  
35  
36  
37  
38  
39  
40  
41  
42  
43  
44  
45  
46  
47  
48  
49  
50  
51  
52  
53  
54  
55  
56  
57  
58  
59  
60

1  
2  
3 **Figure 1: Serum levels of C-reactive protein by napping and**  
4 **time in bed \***  
5  
6  
7  
8  
9  
10

11 \* Values are geometric mean CRP (mg/l) across categories adjusted for age, body  
12 mass index, physical activity, smoking, alcohol intake, social class, education, marital  
13 status, major depressive disorder, self-reported health, pre-existing diseases, systolic  
14 blood pressure, hypnotic drug use, and in women only, postmenopausal hormone  
15 replacement therapy. The sleep measures were mutually adjusted. Vertical bars  
16 represent 95% confidence intervals.  
17  
18  
19  
20  
21  
22  
23  
24  
25  
26  
27  
28  
29  
30  
31  
32  
33  
34  
35  
36  
37  
38  
39  
40  
41  
42  
43  
44  
45  
46  
47  
48  
49  
50  
51  
52  
53  
54  
55  
56  
57  
58  
59  
60

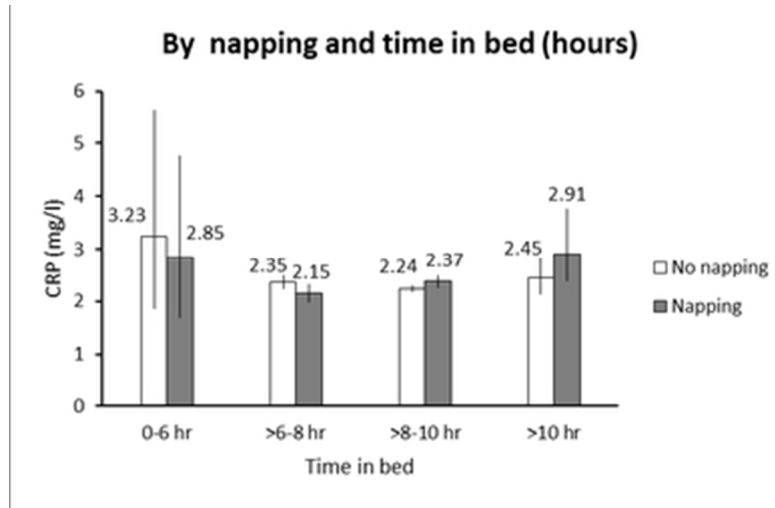

33x21mm (300 x 300 DPI)

er review only

**STROBE 2007 (v4) checklist of items to be included in reports of observational studies in epidemiology\***  
**Checklist for cohort, case-control, and cross-sectional studies (combined)**

| Section/Topic             | Item # | Recommendation                                                                                                                                                                                                                                                                                                                                                                                                                                                         | Reported on page # |
|---------------------------|--------|------------------------------------------------------------------------------------------------------------------------------------------------------------------------------------------------------------------------------------------------------------------------------------------------------------------------------------------------------------------------------------------------------------------------------------------------------------------------|--------------------|
| Title and abstract        | 1      | (a) Indicate the study’s design with a commonly used term in the title or the abstract                                                                                                                                                                                                                                                                                                                                                                                 | 1                  |
|                           |        | (b) Provide in the abstract an informative and balanced summary of what was done and what was found                                                                                                                                                                                                                                                                                                                                                                    | 2                  |
| <b>Introduction</b>       |        |                                                                                                                                                                                                                                                                                                                                                                                                                                                                        |                    |
| Background/rationale      | 2      | Explain the scientific background and rationale for the investigation being reported                                                                                                                                                                                                                                                                                                                                                                                   | 5                  |
| Objectives                | 3      | State specific objectives, including any pre-specified hypotheses                                                                                                                                                                                                                                                                                                                                                                                                      | 6                  |
| <b>Methods</b>            |        |                                                                                                                                                                                                                                                                                                                                                                                                                                                                        |                    |
| Study design              | 4      | Present key elements of study design early in the paper                                                                                                                                                                                                                                                                                                                                                                                                                | 6-7                |
| Setting                   | 5      | Describe the setting, locations, and relevant dates, including periods of recruitment, exposure, follow-up, and data collection                                                                                                                                                                                                                                                                                                                                        | 6-7                |
| Participants              | 6      | (a) <i>Cohort study</i> —Give the eligibility criteria, and the sources and methods of selection of participants. Describe methods of follow-up<br><i>Case-control study</i> —Give the eligibility criteria, and the sources and methods of case ascertainment and control selection. Give the rationale for the choice of cases and controls<br><i>Cross-sectional study</i> —Give the eligibility criteria, and the sources and methods of selection of participants | 6-7                |
|                           |        | (b) <i>Cohort study</i> —For matched studies, give matching criteria and number of exposed and unexposed<br><i>Case-control study</i> —For matched studies, give matching criteria and the number of controls per case                                                                                                                                                                                                                                                 |                    |
| Variables                 | 7      | Clearly define all outcomes, exposures, predictors, potential confounders, and effect modifiers. Give diagnostic criteria, if applicable                                                                                                                                                                                                                                                                                                                               | 7-8                |
| Data sources/ measurement | 8*     | For each variable of interest, give sources of data and details of methods of assessment (measurement). Describe comparability of assessment methods if there is more than one group                                                                                                                                                                                                                                                                                   | 7                  |
| Bias                      | 9      | Describe any efforts to address potential sources of bias                                                                                                                                                                                                                                                                                                                                                                                                              | 8-9                |
| Study size                | 10     | Explain how the study size was arrived at                                                                                                                                                                                                                                                                                                                                                                                                                              | 8                  |
| Quantitative variables    | 11     | Explain how quantitative variables were handled in the analyses. If applicable, describe which groupings were chosen and why                                                                                                                                                                                                                                                                                                                                           | 8-9                |
| Statistical methods       | 12     | (a) Describe all statistical methods, including those used to control for confounding                                                                                                                                                                                                                                                                                                                                                                                  | 9                  |
|                           |        | (b) Describe any methods used to examine subgroups and interactions                                                                                                                                                                                                                                                                                                                                                                                                    | 9                  |
|                           |        | (c) Explain how missing data were addressed                                                                                                                                                                                                                                                                                                                                                                                                                            | 8                  |
|                           |        | (d) <i>Cohort study</i> —If applicable, explain how loss to follow-up was addressed<br><i>Case-control study</i> —If applicable, explain how matching of cases and controls was addressed                                                                                                                                                                                                                                                                              | 8                  |

|                          |     |                                                                                                                                                                                                              |       |
|--------------------------|-----|--------------------------------------------------------------------------------------------------------------------------------------------------------------------------------------------------------------|-------|
|                          |     | <i>Cross-sectional study</i> —If applicable, describe analytical methods taking account of sampling strategy                                                                                                 |       |
|                          |     | (e) Describe any sensitivity analyses                                                                                                                                                                        | 9     |
| <b>Results</b>           |     |                                                                                                                                                                                                              |       |
| Participants             | 13* | (a) Report numbers of individuals at each stage of study—eg numbers potentially eligible, examined for eligibility, confirmed eligible, included in the study, completing follow-up, and analysed            | 10    |
|                          |     | (b) Give reasons for non-participation at each stage                                                                                                                                                         |       |
|                          |     | (c) Consider use of a flow diagram                                                                                                                                                                           |       |
| Descriptive data         | 14* | (a) Give characteristics of study participants (eg demographic, clinical, social) and information on exposures and potential confounders                                                                     | 10    |
|                          |     | (b) Indicate number of participants with missing data for each variable of interest                                                                                                                          | 13    |
|                          |     | (c) <i>Cohort study</i> —Summarise follow-up time (eg, average and total amount)                                                                                                                             |       |
| Outcome data             | 15* | <i>Cohort study</i> —Report numbers of outcome events or summary measures over time                                                                                                                          |       |
|                          |     | <i>Case-control study</i> —Report numbers in each exposure category, or summary measures of exposure                                                                                                         |       |
|                          |     | <i>Cross-sectional study</i> —Report numbers of outcome events or summary measures                                                                                                                           | 8     |
| Main results             | 16  | (a) Give unadjusted estimates and, if applicable, confounder-adjusted estimates and their precision (eg, 95% confidence interval). Make clear which confounders were adjusted for and why they were included | 12    |
|                          |     | (b) Report category boundaries when continuous variables were categorized                                                                                                                                    |       |
|                          |     | (c) If relevant, consider translating estimates of relative risk into absolute risk for a meaningful time period                                                                                             |       |
| Other analyses           | 17  | Report other analyses done—eg analyses of subgroups and interactions, and sensitivity analyses                                                                                                               | 15    |
| <b>Discussion</b>        |     |                                                                                                                                                                                                              |       |
| Key results              | 18  | Summarise key results with reference to study objectives                                                                                                                                                     | 16    |
| Limitations              | 19  | Discuss limitations of the study, taking into account sources of potential bias or imprecision. Discuss both direction and magnitude of any potential bias                                                   | 16-17 |
| Interpretation           | 20  | Give a cautious overall interpretation of results considering objectives, limitations, multiplicity of analyses, results from similar studies, and other relevant evidence                                   | 17-19 |
| Generalisability         | 21  | Discuss the generalisability (external validity) of the study results                                                                                                                                        | 17    |
| <b>Other information</b> |     |                                                                                                                                                                                                              |       |
| Funding                  | 22  | Give the source of funding and the role of the funders for the present study and, if applicable, for the original study on which the present article is based                                                | 21    |

\*Give information separately for cases and controls in case-control studies and, if applicable, for exposed and unexposed groups in cohort and cross-sectional studies.

**Note:** An Explanation and Elaboration article discusses each checklist item and gives methodological background and published examples of transparent reporting. The STROBE checklist is best used in conjunction with this article (freely available on the Web sites of PLoS Medicine at <http://www.plosmedicine.org/>, Annals of Internal Medicine at <http://www.annals.org/>, and Epidemiology at <http://www.epidem.com/>). Information on the STROBE Initiative is available at [www.strobe-statement.org](http://www.strobe-statement.org).
